1 **Mitochondrial cristae biogenesis coordinates with ETC complex IV assembly**  
2 **during *Drosophila* maturation**

3 *Yi-fan Jiang*<sup>1</sup>, *Hsiang-ling Lin*<sup>2</sup>, *Li-jie Wang*<sup>2</sup>, *Tian Hsu*<sup>2</sup>, and *Chi-yu Fu*<sup>2\*</sup>

4 <sup>1</sup>*Graduate Institute of Molecular and Comparative Pathobiology, School of*  
5 *Veterinary Medicine, National Taiwan University, Taipei, Taiwan*

6 <sup>2</sup>*Institute of Cellular and Organismic Biology, Academia Sinica, Taipei, Taiwan*

7

8 **Abstract**

9 Mitochondrial cristae contain electron transport chain complexes and are distinct  
10 from the inner boundary membrane (IBM) in both protein composition and function.  
11 While many details of mitochondrial membrane structure are known, the processes  
12 governing cristae biogenesis, including the organization of lipid membranes and  
13 assembly of nuclear and mitochondrial encoded proteins, remain obscure. We  
14 followed cristae biogenesis *in situ* upon *Drosophila* eclosion using serial-section  
15 electron tomography and revealed that the morphogenesis of lamellar cristae  
16 coordinates with ETC complex IV assembly. The membrane morphogenesis and  
17 functionalization were intricately co-evolved during cristae biogenesis.  
18 Marf-knockdown flies formed mitochondria of smaller sizes and reduced cristae  
19 content but organized lamellar cristae containing ATP synthase and functional COX.  
20 Instead, OPA1-knockdown flies had impaired cristae biogenesis and mitochondria  
21 function. We showed the ultrastructural localization of OPA1 in the cristae besides  
22 IBM that supports its functions in mediating cristae remodeling and inner membrane  
23 fusion. Overall, this study revealed the multilevel coordination of protein-coupled  
24 membrane morphogenesis in building functional cristae.

25

26 Key words: mitochondria/ cristae/ biogenesis/ COX assembly/ membrane  
27 morphogenesis/ electron tomography

28

29 Running title: Mitochondrial cristae biogenesis

30

31 **Introduction**

32 Mitochondria originate from an endosymbiosis event. The organelles exhibit  
33 unique double membrane architecture, consisting of outer and inner membranes that  
34 are separated by an intermembrane space. The inner membrane can be further  
35 subdivided into the inner boundary membrane (IBM) and the cristae invaginations,  
36 based on the ultrastructure, protein composition and function (Cogliati, Enriquez et al.,  
37 2016, Mannella, 2006). In the cristae, electron transport chain (ETC) complexes  
38 generate ATP by creating and maintaining a proton gradient between the matrix and  
39 intermembrane space (Gilkerson, Selker et al., 2003). Importantly, the morphology  
40 and remodeling of cristae are indicative of mitochondrial function, and cristae  
41 ultrastructure is known to be heavily influenced by several critical proteins (Barbot &

42 Meinecke, 2016, Cogliati, Frezza et al., 2013, Frezza, Cipolat et al., 2006,  
43 Quintana-Cabrera, Mehrotra et al., 2018, Scorrano, Ashiya et al., 2002, Zick, Rabl et  
44 al., 2009). ATP synthase has been shown to play a structural role in inducing positive  
45 membrane curvature at the cristae ridges in addition to its enzymatic function (Davies,  
46 Strauss et al., 2011, Strauss, Hofhaus et al., 2008). Secondly, the mitochondrial  
47 contact site and cristae organizing system (MICOS) complex is known to stabilize the  
48 cristae junction, the region where cristae connect to the IBM (Huynen, Muhlmeister et  
49 al., 2016, Rampelt, Zerbes et al., 2017, Schorr & van der Laan, 2017). Optic atrophy  
50 protein 1 (OPA1), a protein involved in inner membrane fusion, also plays a pivotal  
51 role in stabilizing cristae junctions and mediating cristae remodeling during apoptosis  
52 (MacVicar & Langer, 2016, Varanita, Soriano et al., 2015). Even though key proteins  
53 have been identified as being essential for the maintenance and the remodeling of  
54 cristae architecture, the question of how functional cristae form *de novo*, including the  
55 organization of lipid membranes and assembly of proteins encoded by both nuclear  
56 and mitochondrial DNA, remains to be elucidated.

57 In this study, we investigated the mechanisms of cristae biogenesis by  
58 characterizing the mitochondrial development of *Drosophila* upon eclosion, the  
59 emergence of adult flies from pupa. At larval and pupal stages, *Drosophila* uses  
60 aerobic glycolysis to support the rapid growth of body mass and subsequent  
61 metamorphosis (Agrell, 1953, Tennessen, Baker et al., 2011). Their mitochondria  
62 contain only scarce lamellar cristae in the indirect flight muscle (IFM). Upon eclosion,  
63 mitochondria undergo development and establish densely arranged lamellar cristae  
64 that form connective membrane networks (Jiang, Lin et al., 2017b). It provides a  
65 well-characterized physiological time reference to study the *de novo* formation of  
66 functional cristae. Using this model system, we were able to uncover novel  
67 mechanisms of cristae biogenesis that involve intricate coordination of membrane  
68 morphogenesis and ETC complex IV assembly.

69

## 70 **Results**

### 71 **Mitochondria exhibit cristae biogenesis upon *Drosophila* eclosion**

72 To characterize mitochondrial structure in *Drosophila* during eclosion from the  
73 pupa, the IFM of adult flies was sampled at various time points. Thin-section TEM  
74 analysis showed that the mitochondria at day 1 after eclosion contained only a few  
75 organized cristae that were loosely scattered throughout the matrix (Fig 1a). The  
76 mitochondria developed densely packed lamellar cristae, usually within a couple days,  
77 to be what was observed in the matured flies (Fig 1b) (Jiang et al., 2017b). The  
78 mitochondrial protein abundance during maturation was analyzed. The mitochondria  
79 of day 1 flies contained a lower level of ATP5A (complex V of the ETC complex)  
80 compared to those of the week 4 flies according to the immuno-EM analysis (Fig  
81 2a-b). The western blots of the whole fly extracts showed that at day 1, some other  
82 nuclear DNA-encoded mitochondrial proteins, such as pyruvate dehydrogenase

83 (PDHA1), superoxide dismutase 2 (SOD2), and Cytochrome c (Cyt c), were  
84 approximately 30-50% of the levels in the week 4 flies (Fig 2c). On the other hand,  
85 the ribosomal protein, RPS6, was expressed roughly 18-fold more in the day 1 flies  
86 than week 4 flies (Fig 2c). Consistent with this observation, thin-section TEM  
87 micrographs revealed highly abundant ribosome or polyribosome-like structures in  
88 the cytoplasm of day 1 flies, but were much less abundant in the week 4 flies (Fig  
89 1a-b). With this reliably orchestrated transition in mitochondrial morphology, the  
90 eclosion of *Drosophila* provides an excellent model system with which to elucidate  
91 the development of cristae ultrastructure and function *in situ*.

92 To track cristae organization during mitochondrial maturation in 3D, we applied  
93 serial section electron tomography to reconstruct entire mitochondrial volumes. The  
94 global organization of IFM tissue was established upon eclosion with mitochondria  
95 distributed between parallel muscle fibers. In some cases, close inter-mitochondrial  
96 contacts were already observed, which may facilitate communication between  
97 mitochondria (Fig 1a, Movie 1) (Picard, McManus et al., 2015). Mitochondria in the  
98 day 1 flies appeared more polymorphic and contained lamellipodia-like or  
99 filopodia-like extensions, which became ovoid-shaped and filled the cytoplasmic  
100 space between the muscle fibers as they matured (Movie 1). Concentrated  
101 cytoplasmic ribosome or polyribosome-like densities surrounded the immature  
102 mitochondria, which would be expected to support rapid protein synthesis (Fig 1c-d).  
103 A cryo-tomography study reported that cytoplasmic ribosomes associate with the  
104 mitochondrial surface through the interaction with TOM complex (Gold, Chroscicki  
105 et al., 2017).

106 Joined serial tomograms of the day 1 flies showed that the mitochondrial matrix  
107 also contained numerous darkly stained ribosome-like molecules along with the  
108 segments of lamellar cristae (Fig 1c-d, Movie 1). In the mature mitochondria,  
109 mitochondrial ribosomes cannot be readily identified in the densely confined  
110 matrix compartment. Due to the lack of available antibodies against *Drosophila*  
111 mitochondrial ribosome, the change of mitochondrial ribosome level during  
112 maturation was not quantified.

113

#### 114 **Cristae biogenesis coordinates with COX complex assembly**

115 Functional cristae require the proper organization of membrane and protein  
116 assembly. To investigate how membrane morphogenesis is coupled with  
117 functionalization, we took advantage of a traditional method of Cytochrome c oxidase  
118 (COX) staining to visualize COX activity in the context of the ultrastructure  
119 (Seligman, Karnovsky et al., 1968). COX oxidizes 3,3'-diaminobenzidine (DAB) and  
120 forms osmiophilic precipitants in the presence of osmium tetroxide that appear  
121 darkly stained under TEM. The osmium tetroxide substrate also binds to the head  
122 group of phospholipids that creates weak contrast for lipid membranes.

123 Mitochondria of the day 1 flies exhibited some lamellae of cristae with

124 prominent COX activity, while some membranous structures that filled the matrix had  
125 weak staining (Fig 3a). To characterize their 3D arrangement, serial section electron  
126 tomography was applied. In the whole-mitochondria reconstructions, segments of  
127 lamellar cristae were observed scattered throughout the matrix (Fig 3c-e, Movie 2).  
128 The COX-negative membranes appeared as poorly organized reticulum. They  
129 contained very limited COX activity, therefore, we did not define them using the  
130 word “cristae”. The membranes gained COX activity as became organized as a part of  
131 the lamellae with a more defined width (Fig 3c-e, Movie 2).

132 To verify the COX-staining results, we generated a knock-in fly that expresses  
133 Apex2 conjugated to the c-terminus of COX4, a subunit of COX that is synthesized in  
134 the cytoplasm and subsequently transported into the mitochondria (Fig S1a-b). Apex2,  
135 an ascorbate peroxidase, catalyzes the polymerization of DAB in the presence of  
136 hydrogen peroxide (H<sub>2</sub>O<sub>2</sub>), which enhances EM contrast after osmium tetroxide  
137 staining, thus allowing us to track COX4 protein localization at the ultrastructural  
138 level (Martell, Deerinck et al., 2012). Using this method, COX4 was shown to  
139 localize mainly to the organized lamellar cristae in the day 1 flies, which correlated  
140 with the COX activity staining data (Fig 4a). The wild type flies were performed as  
141 the negative control of the Apex2 staining (Fig 4b). According to the structural studies,  
142 the c-terminus of COX4 is apposed to the intermembrane space, where the Apex2  
143 staining appeared (Fig 4a) (Wu, Gu et al., 2016).

144 The COX complex comprises multiple subunits encoded by both nuclear and  
145 mitochondrial DNA. The insertion and assembly of the COX complex subunits  
146 require OXA1, which mediates the insertion of both nuclear and mitochondrial  
147 DNA-encoded polypeptides from the matrix into the inner membrane (Keil, Bareth et  
148 al., 2012, Soto, Fontanesi et al., 2012). OXA1 was shown to present in IBM and  
149 cristae in yeast by immuno-gold EM study (Stoldt, Wenzel et al., 2012). We set out to  
150 visualize if OXA1 also locates in the cristae to facilitate COX assembly during  
151 mitochondrial maturation in *Drosophila*. We tracked OXA1 localization in  
152 OXA1-Apex2 knock-in flies using the Apex2 method aiming for higher spatial  
153 resolution. Indeed Apex2 staining was present in the cristae and the IBM of the day 1  
154 mitochondria (Fig 4c, S1a). The negative control of the Apex2 staining using the wild  
155 type flies was shown in Fig 4d. Judging by the staining location, the c-terminal Apex2  
156 tag faced the matrix side of the inner membrane, and the staining pattern appeared as  
157 granular densities (Fig 4c). The result was confirmed in S2 cells that over-expressed  
158 OXA1-Apex2 (Fig 4e). The cells with mock-transfection were used as the negative  
159 control of Apex2 staining (Fig 4f). The western-blot of OXA1-Apex2 expression in  
160 S2 cells was shown in Fig S1c.

161 The data showed lamellar cristae are organized in coordination with the  
162 assembly of COX during cristae biogenesis upon *Drosophila* eclosion. The study  
163 revealed the intricate coordination of membrane morphogenesis and the acquisition of  
164 functionality.

165

166 **Marf-knockdown flies formed lamellar cristae containing ATP synthase and**  
167 **functional COX**

168 Marf, a homolog of human mitofusin 1 and 2, mediates outer membrane fusion  
169 and influences ER-mitochondria tethering (de Brito & Scorrano, 2008, Detmer &  
170 Chan, 2007, Filadi, Greotti et al., 2015, Filadi, Pendin et al., 2018, Schrepfer &  
171 Scorrano, 2016). To investigate how Marf affects cristae biogenesis and  
172 mitochondrial maturation, we investigated the mitochondrial structure and function of  
173 Marf-knockdown flies. Marf-knockdown flies had compromised climbing ability (Fig  
174 S2a). The whole fly extracts had similar levels of ATP5A, PDHA1, SOD2, and Cyt c  
175 as compared to the wild type flies (Fig S2b). Thin-section TEM and serial-section  
176 tomography revealed that lamellar cristae were formed in Marf-knockdown  
177 mitochondria (Fig 5a-d, Fig S2c-d, Movie 3). In addition, they contained COX  
178 activity (Fig 5e, S2d), as well as ATP5A and Cyt c shown by the immuno-EM (Fig 5f,  
179 Fig S2f). The Apex2 staining of the ATP synthase OSCP-Apex2 knock-in flies under  
180 the Marf-knockdown background also confirmed the presence of ATP synthase OSCP  
181 in the cristae (Fig 5g, Fig S2h). The dark staining of OSCP-Apex2 was restricted to  
182 the matrix side of the cristae. It correlated with the structural studies of properly  
183 assembled ATP synthase and suggested correct folding and targeting of OSCP-Apex2  
184 in the knock-in flies (Fig 5g) (Wu et al., 2016, Zhou, Rohou et al., 2015).

185 Even though Marf-knockdown mitochondria organized lamellar cristae that  
186 contain COX and ATP synthase, they were approximately 49% smaller than the wild  
187 type, which was expected given that mitochondrial outer membrane fusion was  
188 impaired. In addition, the cristae content per mitochondrial volume was reduced to  
189 approximately 53% in the Marf-knockdown flies, comparing to approximately 99% in  
190 the wild type at week 4. This observation probably reflects the alteration of  
191 ER-mitochondria contacts in the Marf-knockdown, which is essential for lipid  
192 transport to the mitochondria from the ER (Area-Gomez, Del Carmen Lara Castillo et  
193 al., 2012, Filadi et al., 2018, Tatsuta & Langer, 2017, Vance, 2014).

194

195 **OPA1-knockdown flies showed impaired cristae biogenesis and function**

196 We investigated how OPA1 affects cristae biogenesis and function.  
197 OPA1-knockdown flies showed reduced climbing ability (Fig S3a). Several nuclear  
198 DNA-encoded mitochondrial proteins in the whole fly extracts were at a similar level  
199 as in the wild type flies (Fig S3b). OPA1-knockdown mitochondria were  
200 approximately 42 % smaller than the wild type mitochondria, as a result of defective  
201 mitochondrial fusion. Many mitochondria contained very few organized membranes  
202 but vacuoles, some likely resulting from the incomplete inner membrane fusion post  
203 the outer membrane fusion (Fig 6a, Fig S3c). Most OPA1-knockdown mitochondria  
204 had disordered and aberrant membranes.

205 OPA1-knockdown mitochondria also had very low levels of functional COX  
206 assemblies in both day 1 and week 4 flies (Fig 6b, Fig S3d, Movie 4). Only about 5%  
207 of the mitochondria exhibited positive COX staining. Immuno-EM suggested a  
208 reduced level of ATP5A (F<sub>1</sub> subunit  $\alpha$ ) and cytochrome c proteins in  
209 OPA1-knockdown mitochondria (Fig 6c, Fig S3e-g). In correlation, ATP synthase  
210 OSCP-Apex2 knock-in conjugates under OPA1-knockdown background only  
211 appeared in a few regional lamellar membranes (Fig 6d). Dysmorphic cristae  
212 ultrastructure and decreased ETC assemblies likely led to a vicious circle of low  
213 membrane potential and impaired protein transport (Harbauer, Zahedi et al., 2014,  
214 Song, Chen et al., 2007). OPA1 was also shown to affect mitochondrial DNA  
215 maintenance that likely contributed to the poor mitochondrial function and  
216 morphogenesis (Elachouri, Vidoni et al., 2011).

217 We tracked OPA1 localization by Apex2 conjugation in 293T cells  
218 overexpressing human OPA1-Apex2 (Fig 6e, S4a-b), as well as in S2 cells  
219 overexpressing *D. melanogaster* OPA1-Apex2 (Fig S4c-d). OPA1 protein was  
220 observed in both cristae and the IBM. Opa1-Apex2 knock-in flies had very low  
221 expression of OPA1-Apex2, approximately 7% of the expression of COX4-Apex2  
222 knock-in by western blot against Flag tag (Fig S1a, S4e-f). The ultrastructural  
223 localization of OPA1 supports its roles in mediating inner membrane fusion and  
224 cristae remodeling.

225

## 226 Discussion

227 In this study, we took the advantage of *Drosophila* model that displayed  
228 dramatic cristae biogenesis upon eclosion in building compact lamellar cristae. We  
229 showed that the development of cristae morphology and functionality is intricately  
230 coordinated. The COX complex is composed of subunits encoded by both nuclear and  
231 mitochondrial DNA. The assembly pathway has been described in great detail and  
232 involves the coordination of multiple steps, including protein synthesis, membrane  
233 insertion, assembly, and metal incorporation, all of which are mediated by various  
234 chaperones and accessory proteins (Soto et al., 2012). Our study uncovered an extra  
235 layer of coordination between the assembly of COX and the establishment of initial  
236 cristae ultrastructure. Previously, ATP synthase has been demonstrated essential in  
237 cristae morphogenesis (Davies et al., 2011, Strauss et al., 2008), so as cristae  
238 morphology to determine the ETC supercomplex assembly and respiratory efficiency  
239 (Cogliati et al., 2013). The intimate connection of cristae morphology with ETC  
240 assembly and function is reiterated in this study.

241 Marf is a homolog of human mitofusin 1 and mitofusin 2. It is involved in  
242 mitochondrial outer membrane fusion, ER-mitochondria contact, and neuromuscular  
243 function (de Brito & Scorrano, 2008, Detmer & Chan, 2007, Filadi et al., 2015, Filadi  
244 et al., 2018, Khalil, Cabirol-Pol et al., 2017, Sandoval, Yao et al., 2014, Schrepfer &  
245 Scorrano, 2016). Marf-knockdown flies display smaller size of mitochondria as a

246 phenotype of inhibiting outer membrane fusion. They also have reduced cristae  
247 membrane content. Most mitochondrial lipids or the precursors are imported from ER  
248 through the proteins mediating membrane contacts and lipid translocation (Flis &  
249 Daum, 2013, Tatsuta & Langer, 2017). Cardiolipin, in particular, was shown to  
250 stabilize ETC components and shape cristae architecture (Desmurs, Foti et al., 2015,  
251 Paradies, Paradies et al., 2014). Significant reduction of cristae content per  
252 mitochondrial volume was observed in the Marf-knockdown. However, cristae  
253 biogenesis is not noticeably affected as they form lamellar cristae harboring ATP  
254 synthase and functional COX. Previous studies also showed normal cristae  
255 morphology and ETC supercomplex assembly, even though mtDNA copy number is  
256 reduced (Cogliati et al., 2013).

257 On the contrary, OPA1-knockdown flies display severe impairment in cristae  
258 morphogenesis and function, likely reflects its essential role in various aspects of  
259 mitochondrial processes. OPA1, a dynamin-related GTPase, is anchored in the inner  
260 membrane in its long isoform. Upon proteolytic cleavage, the short isoform becomes  
261 localized to the intermembrane space. This proteolysis-mediated redistribution is an  
262 important regulatory mechanism in OPA1-mediated membrane fusion and fission  
263 (Ban, Ishihara et al., 2017, Del Dotto, Mishra et al., 2017, MacVicar & Langer, 2016).  
264 OPA1 has also been shown to control cristae remodeling and junction widening  
265 during apoptosis (Frezza et al., 2006). It interacts with MICOS component Mic60 in  
266 the cristae and cristae junction (Hoppins, Collins et al., 2011, Sastri, Darshi et al.,  
267 2017). OPA1 protects mitochondria from complex III inhibition by stabilizing cristae  
268 morphology and ATP synthase oligomers (Quintana-Cabrera, Quirin et al., 2018). In  
269 this study, we reported the ultrastructural localization of OPA1 in the cristae besides  
270 the IBM, which supports its multiple roles in cristae remodeling and inner membrane  
271 fusion.

272 Through evolution, mitochondria have been delicately integrated as organelles,  
273 which contain highly functionalized compartments and membranes. Thus, it is no  
274 surprise that a sophisticated biomolecular interaction network is being uncovered in  
275 the regulation of cristae architecture (Jayashankar, Mueller et al., 2016). A model of  
276 cristae formation was proposed previously where one pathway involves mitochondrial  
277 fusion and OPA1-mediated inner membrane fusion, while in another cristae are  
278 formed through the invagination of IBM independent of mitochondrial fusion (Harner,  
279 Unger et al., 2016). In the study, we demonstrated the intricate multilevel  
280 coordination of building functional cristae. The generalized mechanism of  
281 protein-coupled membrane morphogenesis was clearly demonstrated for cristae  
282 biogenesis, which is in line with various other membrane remodeling processes, such  
283 as vesicle budding and fusion (Bonifacino & Glick, 2004).

284  
285  
286

## 287 **Materials and Methods**

### 288 *Fly strains*

289 *Drosophila* strains on the Oregon-R-P2 background were used in these studies.  
290 Marf-knockdown flies were obtained by crossing UAS (Bloomington 31157) and  
291 GAL4 (Bloomington 26882) lines. OPA1-knockdown flies were obtained by crossing  
292 UAS (Bloomington 32358) and GAL4 (Bloomington 38459) lines.

293 Apex2-Flag knock-in flies of COX4, OXA1, ATP synthase OSCP, and OPA1  
294 were generated by CRISPR/Cas9-mediated genome editing and homology-dependent  
295 repair using a guide RNA(s) and a dsDNA plasmid donor. PBac system was used to  
296 facilitate genetic screening (Well Genetics). To generate ATP synthase OSCP-Apex2  
297 under Marf-knockdown background, a stable line was selected by crossing ATP  
298 synthase OSCP-Apex2 line with GAL4 (Bloomington 26882) line, which was  
299 subsequently crossed with UAS (Bloomington 31157) line. To generate ATP synthase  
300 OSCP-Apex2 under OPA1-knockdown background, a stable line was selected by  
301 crossing ATP synthase OSCP-Apex2 line with GAL4 (Bloomington 38459) line,  
302 which was subsequently crossed with UAS (Bloomington 32358) line.

303

### 304 *HPF/FS specimen preparation for morphological observation*

305 Flies were anesthetized on ice and embedded in 4% low melting agarose in 0.1  
306 M phosphate buffer. Embedded flies were then sectioned to 100  $\mu\text{m}$ -thick slices by a  
307 vibrating blade microtome (Leica VT1200S) and fixed in 2.5% glutaraldehyde in  
308 phosphate buffer.

309 HPF/FS was also performed as previously described (Jiang, Lin et al., 2017a,  
310 Jiang et al., 2017b). The tissue sections were washed in 3 drops ( $\sim 150 \mu\text{l}$ ) of  
311 phosphate buffer, followed by 2 drops ( $\sim 100 \mu\text{l}$ ) of phosphate buffer with 20 % BSA.  
312 The specimens were subsequently placed in the gold carrier filled with 20 % BSA in  
313 PBS. The carriers were loaded into a high-pressure freezer (Leica EM HPM100)  
314 according to manufacturer's instructions. The carriers were subsequently released  
315 from the holder under liquid nitrogen and transferred to the chamber of a  
316 freeze-substitution device (Leica EM AFS2) pre-cooled to  $-140 \text{ }^\circ\text{C}$  and incubated for  
317 96 hr before FS.

318 During FS, the temperature of the chamber was raised to  $0 \text{ }^\circ\text{C}$  at a slope of 5  
319  $^\circ\text{C/hr}$ . During the process, the specimens were substituted with 0.1 % uranyl acetate  
320 and 2 % glutaraldehyde in acetone at  $-60 \text{ }^\circ\text{C}$  for 12 hr, followed by 2 % osmium  
321 tetroxide at  $-25 \text{ }^\circ\text{C}$  for 12 hr, and washed with acetone at  $0 \text{ }^\circ\text{C}$  three times for 1 hr  
322 each. The specimens were subsequently removed from the carriers using a needle,  
323 infiltrated and embedded in EMBED-812 resin at room temperature, which was  
324 polymerized at  $65 \text{ }^\circ\text{C}$  for 16 hr. The specimen blocks were trimmed and sectioned  
325 using an ultramicrotome. The sections were stained with Reynold's lead citrate for 10  
326 min and subjected to TEM inspection.

327



### 328 ***Serial-section electron tomography***

329 The procedure was also performed as previously described (Jiang et al., 2017a,  
330 Jiang et al., 2017b). Serial sections with a thickness of 200 nm were prepared and  
331 collected on copper slot grids (2 x 0.5mm oval slots) with carbon supports, on which  
332 overlaid with 10 nm fiducial gold pretreated with BSA. The grids were stained with  
333 Reynold's lead citrate before the second layer of fiducial gold was applied. The  
334 specimens were imaged with FEI Tecnai TEM operating at 200 kV and the  
335 micrographs were recorded with a Gatan UltraScan 1000 CCD at 0.87 nm/pixel  
336 (9,600x). Tilt series from -60° to +60° with 2° increments were acquired at 10 µm  
337 defocus using Leginon automatic data collection software (Suloway, Shi et al., 2009).  
338 Double tilt series were collected using a double tilt holder (Model 2040 Dual-Axis  
339 Tomography Holder, Fischione). Serial tomograms were reconstructed, joined using  
340 IMOD, and segmented using Avizo 3D software (FEI).

341

### 342 ***EM staining for COX activity***

343 The procedure was modified as previously described (Seligman et al., 1968).  
344 Vibrating blade microtome sections of the fly tissues were washed with PBS and  
345 stained for 3 hr at 37 °C in a staining solution that contained 5 mg  
346 3,3'-diaminobenzidine tetrahydrochloride (DAB), 9 ml sodium phosphate buffer  
347 (0.05M, pH7.4), 750 mg sucrose, 20 µg catalase (dissolved in 0.05M potassium  
348 phosphate buffer, pH 7.0), and 10 mg cytochrome c (dissolved in distilled water) at a  
349 volume of 10 ml. Subsequently, the specimens were washed with PBS for 1 hr and  
350 subjected to standard osmium fixation, dehydration, infiltration and embedded using  
351 Embed-812 resin. The blocks were cut to thin-sections of 70 nm thicknesses and  
352 observed under TEM without further staining.

353

### 354 ***HPF/FS specimen preparation for immuno-EM labeling***

355 Flies were sectioned in fixatives containing 4 % paraformaldehyde, 0.25 %  
356 glutaraldehyde in phosphate buffer and subjected to HPF/FS as described above with  
357 some modifications. Immuno-EM specimens were freeze-substituted with 0.1 %  
358 uranyl acetate in acetone at -90 °C for 58 hr (agitated every 8 hr), and warmed up to  
359 -45 °C at a slope of 5 °C /hr, washed with acetone three times for 1 hr each. The  
360 specimens were subsequently infiltrated through an ascending gradient of Lowicryl  
361 HM20 resin (10%, 20%, 40%, 60%, 80% and 90%, 8hr for each concentration, and  
362 agitated every 2 hr). The chamber was further warmed up to -25 °C at 5 °C /hr. The  
363 solutions were replaced with 100 % HM20 three times for 24 hr each (agitated every  
364 2 hr). After adjusting the orientation within the carriers, ultraviolet polymerization  
365 was performed at -25 °C for 48 hr. The chamber was later warmed up to 20 °C (5°C  
366 /hr) and exposed to ultraviolet radiation for another 48 hr.

367 After polymerization, the specimen blocks were detached from HPF carriers. 100

368 nm thick sections were prepared and placed on 200-mesh nickel grids for  
369 immuno-EM labeling.

370

### 371 ***Immuno-EM labeling***

372 Thin sections placed on nickel grids were blocked with 10 % BSA in PBS for 20  
373 min and incubated with primary antibodies in incubation buffer (1% BSA in PBS) for  
374 2 hr. Grids were subsequently washed with incubation buffer three times (10 min  
375 each). Secondary antibodies, goat anti-mouse IgG (EM.GMHL15, BB International)  
376 and protein A (EM.PAG15, BB International) conjugated to 15 nm gold particles,  
377 were used against the primary antibodies from mouse and rabbit respectively.  
378 Secondary antibodies at 20-fold dilution were applied and samples were incubated for  
379 1 hr. After washing with PBS, the immune-complexes were fixed with 1%  
380 glutaraldehyde in PBS and washed three times with distilled water. The specimens  
381 were inspected by TEM operating at 120 kV (FEI Tecnai G2 TF20 Super TWIN).

382 The primary antibodies and applied dilution factors are listed as follows: mouse  
383 anti-dsDNA (500x, abcam ab27156), mouse anti-ATP5A (500x, abcam ab14748),  
384 mouse anti-Cytochrome C (8000x, abcam ab13575), mouse anti-PDHA1 (500x,  
385 abcam ab110334), mouse anti-Ubiquitin (1000x, abcam ab7254), mouse  
386 anti-DNA-RNA hybrid (500x, kerafast ENH001), and rabbit anti-SOD2 (500x, abcam  
387 ab13534).

388

### 389 ***Apex2 staining EM***

390 The protocol was modified as previously described (Hung, Udeshi et al., 2016).  
391 Vibratome sections of the fly tissues were fixed in 2% glutaraldehyde in 0.1 M  
392 sodium cacodylate with 2 mM CaCl<sub>2</sub>, pH 7. Residual glutaraldehyde was quenched  
393 with 20 mM glycine followed by the washing steps. The specimens were  
394 subsequently stained with 0.5 mg/ml DAB-4HCL (3,3'-diaminobenzidine) and 0.3%  
395 H<sub>2</sub>O<sub>2</sub> in the buffer for 30 min, washed, and stained with 1% osmium tetroxide for 30  
396 min. After washes, the specimens were stained with 1% uranyl acetate overnight. The  
397 specimens were further dehydrated and embedded in resin for thin-section and TEM  
398 observation.

399

### 400 ***Cell culture for Apex2 staining***

401 293T cells were seeded on plastic membranes in a 6-well culture plate. The cells  
402 reached >80% confluence after overnight culture and were transfected with  
403 pECFP-OPA1 (human isoform1)-Apex2-Flag using *TransIT-X2* (Thermo-Fisher).  
404 After incubation overnight, the monolayer cells were fixed with 2% glutaraldehyde  
405 and followed the Apex2 staining procedure as described above (Hung et al., 2016).

406 S2 cells were seeded in a 6-well culture plate at 1\*10<sup>6</sup> cells/ml and grew for  
407 another day to 2-4\*10<sup>6</sup> cells/ml. The cells were transfected with  
408 pMT-V5-HisB-OXA1 (*D. melanogaster*)-Apex2-Flag or pMT-V5-HisB-OPA1 (*D.*

409 *melanogaster*)-Apex2-Flag using calcium phosphate transfection kit (Invitrogen) and  
410 induced protein expression by CuSO<sub>4</sub>. The cells were harvested 2-3 days  
411 post-induction, fixed with 2% glutaraldehyde and followed the Apex2 staining  
412 procedure as described above (Hung et al., 2016).

413

#### 414 ***Western blot analysis***

415 Flies were dissected and homogenized by Dounce tissue grinder in RIPA  
416 buffer containing protease inhibitor (cOmplete™, Roche). Cellular debris was  
417 removed by centrifugation at 4°C, 14000 x g for 20 min. The supernatants were  
418 collected and the protein concentrations were determined by Pierce protein  
419 assay (Pierce 660 nm Protein Assay Reagent, ThermoScientific). 0.6 µg/well of  
420 proteins were loaded for SDS-PAGE and western-blot analysis.

421 The antibodies used in the studies were as follows: mouse anti-ATP5A (50000x,  
422 abcam ab14748), mouse anti-Cytochrome C (10000x, abcam ab13575), mouse  
423 anti-PDHA1 (1000x, abcam ab110334) or rabbit anti-SOD2 (10000x, abcam  
424 ab13534), and rabbit anti-alpha tubulin (10000x, abcam ab18251), anti-mouse  
425 IgG-HRP (2000x, Invitrogen 62-6520) or anti-rabbit IgG-HRP (5000x, abcam  
426 ab97051). For quantification, ratios of the densitometry signal of individual proteins  
427 to that of alpha-tubulin were calculated. The ratios were then normalized to the wild  
428 type at week 4.

429

#### 430 ***Mitochondria analysis***

431 The changes in the mitochondrial size of Marf and OPA1-knockdown vs. the  
432 wild type were calculated using thin-section EM micrographs. For each type, over a  
433 hundred mitochondria were analyzed. The cristae to mitochondrial membrane content  
434 of Marf-knockdown and the wild type 3D tomograms were analyzed using the  
435 automatic segmentation and analysis of Avizo 3D.

436

#### 437 ***Climbing assay***

438 Flies were knocked down to the bottom of the culture tubes. Numbers of flies  
439 climbing over the target line (about 18cm) over 3 min were recorded. About 15 flies  
440 were used for each triplicate.

441

#### 442 **Acknowledgments**

443 We thank the EM core of Institute of Cellular and Organismic Biology and the  
444 cryo-EM core of Academia Sinica, Taiwan. We thank Dr. Ya-Hui Chou for the  
445 helpful discussion on *Drosophila* genetics. We thank the funding support from  
446 Academia Sinica AS-105-TP-B04 and MOST 105-2628-B-001-004-MY3.

447

#### 448 **Author contributions**

449 Yi-fan Jiang and Chi-yu Fu designed the experiments; Yi-fan Jiang, Hsiang-ling

450 Lin, Li-jie Wang, and Tian Hsu performed the experiments; Chi-yu Fu wrote the  
451 paper.

452

453 **Competing interests:** The authors declare no competing financial interests.

454

455

## 456 **References**

457 Agrell I (1953) The aerobic and anaerobic utilization of metabolic energy during  
458 insect metamorphosis. *Acta Physiol Scand* 28: 306-35

459 Area-Gomez E, Del Carmen Lara Castillo M, Tambini MD, Guardia-Laguarta C, de  
460 Groof AJ, Madra M, Ikenouchi J, Umeda M, Bird TD, Sturley SL, Schon EA (2012)  
461 Upregulated function of mitochondria-associated ER membranes in Alzheimer  
462 disease. *EMBO J* 31: 4106-23

463 Ban T, Ishihara T, Kohno H, Saita S, Ichimura A, Maenaka K, Oka T, Mihara K,  
464 Ishihara N (2017) Molecular basis of selective mitochondrial fusion by  
465 heterotypic action between OPA1 and cardiolipin. *Nat Cell Biol* 19: 856-863

466 Barbot M, Meinecke M (2016) Reconstitutions of mitochondrial inner membrane  
467 remodeling. *Journal of structural biology* 196: 20-8

468 Bonifacino JS, Glick BS (2004) The mechanisms of vesicle budding and fusion.  
469 *Cell* 116: 153-66

470 Cogliati S, Enriquez JA, Scorrano L (2016) Mitochondrial Cristae: Where Beauty  
471 Meets Functionality. *Trends Biochem Sci* 41: 261-273

472 Cogliati S, Frezza C, Soriano ME, Varanita T, Quintana-Cabrera R, Corrado M,  
473 Cipolat S, Costa V, Casarin A, Gomes LC, Perales-Clemente E, Salviati L,  
474 Fernandez-Silva P, Enriquez JA, Scorrano L (2013) Mitochondrial cristae shape  
475 determines respiratory chain supercomplexes assembly and respiratory  
476 efficiency. *Cell* 155: 160-71

477 Davies KM, Strauss M, Daum B, Kief JH, Osiewacz HD, Rycovska A, Zickermann V,  
478 Kuhlbrandt W (2011) Macromolecular organization of ATP synthase and  
479 complex I in whole mitochondria. *Proceedings of the National Academy of  
480 Sciences of the United States of America* 108: 14121-6

481 de Brito OM, Scorrano L (2008) Mitofusin 2 tethers endoplasmic reticulum to  
482 mitochondria. *Nature* 456: 605-10

483 Del Dotto V, Mishra P, Vidoni S, Fogazza M, Maresca A, Caporali L, McCaffery JM,  
484 Cappelletti M, Baruffini E, Lenaers G, Chan D, Rugolo M, Carelli V, Zanna C (2017)  
485 OPA1 Isoforms in the Hierarchical Organization of Mitochondrial Functions. *Cell  
486 Rep* 19: 2557-2571

487 Desmurs M, Foti M, Raemy E, Vaz FM, Martinou JC, Bairoch A, Lane L (2015)  
488 C11orf83, a mitochondrial cardiolipin-binding protein involved in bc1 complex  
489 assembly and supercomplex stabilization. *Mol Cell Biol* 35: 1139-56

490 Detmer SA, Chan DC (2007) Functions and dysfunctions of mitochondrial  
491 dynamics. *Nat Rev Mol Cell Biol* 8: 870-9

492 Elachouri G, Vidoni S, Zanna C, Pattyn A, Boukhaddaoui H, Gaget K, Yu-Wai-Man P,  
493 Gasparre G, Sarzi E, Delettre C, Olichon A, Loiseau D, Reynier P, Chinnery PF,  
494 Rotig A, Carelli V, Hamel CP, Rugolo M, Lenaers G (2011) OPA1 links human  
495 mitochondrial genome maintenance to mtDNA replication and distribution.  
496 *Genome Res* 21: 12-20

497 Filadi R, Greotti E, Turacchio G, Luini A, Pozzan T, Pizzo P (2015) Mitofusin 2  
498 ablation increases endoplasmic reticulum-mitochondria coupling. *Proc Natl Acad*  
499 *Sci U S A* 112: E2174-81

500 Filadi R, Pendin D, Pizzo P (2018) Mitofusin 2: from functions to disease. *Cell*  
501 *Death Dis* 9: 330

502 Flis VV, Daum G (2013) Lipid transport between the endoplasmic reticulum and  
503 mitochondria. *Cold Spring Harb Perspect Biol* 5

504 Frezza C, Cipolat S, Martins de Brito O, Micaroni M, Beznoussenko GV, Rudka T,  
505 Bartoli D, Polishuck RS, Danial NN, De Strooper B, Scorrano L (2006) OPA1  
506 controls apoptotic cristae remodeling independently from mitochondrial fusion.  
507 *Cell* 126: 177-89

508 Gilkerson RW, Selker JM, Capaldi RA (2003) The cristal membrane of  
509 mitochondria is the principal site of oxidative phosphorylation. *FEBS Lett* 546:  
510 355-8

511 Gold VA, Chroscicki P, Bragoszewski P, Chacinska A (2017) Visualization of  
512 cytosolic ribosomes on the surface of mitochondria by electron cryo-tomography.  
513 *EMBO Rep* 18: 1786-1800

514 Harbauer AB, Zahedi RP, Sickmann A, Pfanner N, Meisinger C (2014) The protein  
515 import machinery of mitochondria-a regulatory hub in metabolism, stress, and  
516 disease. *Cell Metab* 19: 357-72

517 Harner ME, Unger AK, Geerts WJ, Mari M, Izawa T, Stenger M, Geimer S, Reggiori  
518 F, Westermann B, Neupert W (2016) An evidence based hypothesis on the  
519 existence of two pathways of mitochondrial crista formation. *Elife* 5

520 Hoppins S, Collins SR, Cassidy-Stone A, Hummel E, Devay RM, Lackner LL,  
521 Westermann B, Schuldiner M, Weissman JS, Nunnari J (2011) A  
522 mitochondrial-focused genetic interaction map reveals a scaffold-like complex  
523 required for inner membrane organization in mitochondria. *The Journal of cell*  
524 *biology* 195: 323-40

525 Hung V, Udeshi ND, Lam SS, Loh KH, Cox KJ, Pedram K, Carr SA, Ting AY (2016)  
526 Spatially resolved proteomic mapping in living cells with the engineered  
527 peroxidase APEX2. *Nat Protoc* 11: 456-75

528 Huynen MA, Muhlmeister M, Gotthardt K, Guerrero-Castillo S, Brandt U (2016)  
529 Evolution and structural organization of the mitochondrial contact site (MICOS)  
530 complex and the mitochondrial intermembrane space bridging (MIB) complex.

531 Biochimica et biophysica acta 1863: 91-101  
532 Jayashankar V, Mueller IA, Rafelski SM (2016) Shaping the multi-scale  
533 architecture of mitochondria. *Current opinion in cell biology* 38: 45-51  
534 Jiang YF, Lin HL, Fu CY (2017a) 3D Mitochondrial Ultrastructure of *Drosophila*  
535 Indirect Flight Muscle Revealed by Serial-section Electron Tomography. *Journal*  
536 *of visualized experiments : JoVE*  
537 Jiang YF, Lin SS, Chen JM, Tsai HZ, Hsieh TS, Fu CY (2017b) Electron tomographic  
538 analysis reveals ultrastructural features of mitochondrial cristae architecture  
539 which reflect energetic state and aging. *Sci Rep* 7: 45474  
540 Keil M, Bareth B, Woellhaf MW, Peleh V, Prestele M, Rehling P, Herrmann JM  
541 (2012) Oxa1-ribosome complexes coordinate the assembly of cytochrome C  
542 oxidase in mitochondria. *The Journal of biological chemistry* 287: 34484-93  
543 Khalil B, Cabirol-Pol MJ, Miguel L, Whitworth AJ, Lecourtois M, Lievens JC (2017)  
544 Enhancing Mitofusin/Marf ameliorates neuromuscular dysfunction in *Drosophila*  
545 models of TDP-43 proteinopathies. *Neurobiol Aging* 54: 71-83  
546 MacVicar T, Langer T (2016) OPA1 processing in cell death and disease - the long  
547 and short of it. *J Cell Sci* 129: 2297-306  
548 Mannella CA (2006) Structure and dynamics of the mitochondrial inner  
549 membrane cristae. *Biochimica et biophysica acta* 1763: 542-8  
550 Martell JD, Deerinck TJ, Sancak Y, Poulos TL, Mootha VK, Sosinsky GE, Ellisman  
551 MH, Ting AY (2012) Engineered ascorbate peroxidase as a genetically encoded  
552 reporter for electron microscopy. *Nature biotechnology* 30: 1143-8  
553 Paradies G, Paradies V, De Benedictis V, Ruggiero FM, Petrosillo G (2014)  
554 Functional role of cardiolipin in mitochondrial bioenergetics. *Biochimica et*  
555 *biophysica acta* 1837: 408-17  
556 Picard M, McManus MJ, Csordas G, Varnai P, Dorn GW, 2nd, Williams D,  
557 Hajnoczky G, Wallace DC (2015) Trans-mitochondrial coordination of cristae at  
558 regulated membrane junctions. *Nat Commun* 6: 6259  
559 Quintana-Cabrera R, Mehrotra A, Rigoni G, Soriano ME (2018) Who and how in  
560 the regulation of mitochondrial cristae shape and function. *Biochem Biophys Res*  
561 *Commun* 500: 94-101  
562 Quintana-Cabrera R, Quirin C, Glytsou C, Corrado M, Urbani A, Pellattiero A, Calvo  
563 E, Vazquez J, Enriquez JA, Gerle C, Soriano ME, Bernardi P, Scorrano L (2018) The  
564 cristae modulator Optic atrophy 1 requires mitochondrial ATP synthase  
565 oligomers to safeguard mitochondrial function. *Nat Commun* 9: 3399  
566 Rampelt H, Zerbes RM, van der Laan M, Pfanner N (2017) Role of the  
567 mitochondrial contact site and cristae organizing system in membrane  
568 architecture and dynamics. *Biochimica et biophysica acta* 1864: 737-746  
569 Sandoval H, Yao CK, Chen K, Jaiswal M, Donti T, Lin YQ, Bayat V, Xiong B, Zhang K,  
570 David G, Charng WL, Yamamoto S, Duraine L, Graham BH, Bellen HJ (2014)  
571 Mitochondrial fusion but not fission regulates larval growth and synaptic

572 development through steroid hormone production. *Elife* 3  
573 Sastri M, Darshi M, Mackey M, Ramachandra R, Ju S, Phan S, Adams S, Stein K,  
574 Douglas CR, Kim JJ, Ellisman MH, Taylor SS, Perkins GA (2017)  
575 Sub-mitochondrial localization of the genetic-tagged mitochondrial  
576 intermembrane space-bridging components Mic19, Mic60 and Sam50. *J Cell Sci*  
577 130: 3248-3260  
578 Schorr S, van der Laan M (2017) Integrative functions of the mitochondrial  
579 contact site and cristae organizing system. *Semin Cell Dev Biol*  
580 Schrepfer E, Scorrano L (2016) Mitofusins, from Mitochondria to Metabolism.  
581 *Molecular cell* 61: 683-694  
582 Scorrano L, Ashiya M, Buttle K, Weiler S, Oakes SA, Mannella CA, Korsmeyer SJ  
583 (2002) A distinct pathway remodels mitochondrial cristae and mobilizes  
584 cytochrome c during apoptosis. *Dev Cell* 2: 55-67  
585 Seligman AM, Karnovsky MJ, Wasserkrug HL, Hanker JS (1968) Nondroplet  
586 ultrastructural demonstration of cytochrome oxidase activity with a  
587 polymerizing osmiophilic reagent, diaminobenzidine (DAB). *J Cell Biol* 38: 1-14  
588 Song Z, Chen H, Fiket M, Alexander C, Chan DC (2007) OPA1 processing controls  
589 mitochondrial fusion and is regulated by mRNA splicing, membrane potential,  
590 and Yme1L. *The Journal of cell biology* 178: 749-55  
591 Soto IC, Fontanesi F, Liu J, Barrientos A (2012) Biogenesis and assembly of  
592 eukaryotic cytochrome c oxidase catalytic core. *Biochimica et biophysica acta*  
593 1817: 883-97  
594 Stoldt S, Wenzel D, Hildenbeutel M, Wurm CA, Herrmann JM, Jakobs S (2012) The  
595 inner-mitochondrial distribution of Oxa1 depends on the growth conditions and  
596 on the availability of substrates. *Mol Biol Cell* 23: 2292-301  
597 Strauss M, Hofhaus G, Schroder RR, Kuhlbrandt W (2008) Dimer ribbons of ATP  
598 synthase shape the inner mitochondrial membrane. *EMBO J* 27: 1154-60  
599 Suloway C, Shi J, Cheng A, Pulokas J, Carragher B, Potter CS, Zheng SQ, Agard DA,  
600 Jensen GJ (2009) Fully automated, sequential tilt-series acquisition with Leginon.  
601 *Journal of structural biology* 167: 11-8  
602 Tatsuta T, Langer T (2017) Intramitochondrial phospholipid trafficking. *Biochim*  
603 *Biophys Acta* 1862: 81-89  
604 Tennessen JM, Baker KD, Lam G, Evans J, Thummel CS (2011) The *Drosophila*  
605 estrogen-related receptor directs a metabolic switch that supports  
606 developmental growth. *Cell metabolism* 13: 139-48  
607 Vance JE (2014) MAM (mitochondria-associated membranes) in mammalian  
608 cells: lipids and beyond. *Biochim Biophys Acta* 1841: 595-609  
609 Varanita T, Soriano ME, Romanello V, Zaglia T, Quintana-Cabrera R, Semenzato M,  
610 Menabo R, Costa V, Civiletto G, Pesce P, Viscomi C, Zeviani M, Di Lisa F, Mongillo  
611 M, Sandri M, Scorrano L (2015) The OPA1-dependent mitochondrial cristae  
612 remodeling pathway controls atrophic, apoptotic, and ischemic tissue damage.

613 Cell metabolism 21: 834-44  
614 Wu M, Gu J, Guo R, Huang Y, Yang M (2016) Structure of Mammalian Respiratory  
615 Supercomplex I1III2IV1. Cell 167: 1598-1609 e10  
616 Zhou A, Rohou A, Schep DG, Bason JV, Montgomery MG, Walker JE, Grigorieff N,  
617 Rubinstein JL (2015) Structure and conformational states of the bovine  
618 mitochondrial ATP synthase by cryo-EM. Elife 4: e10180  
619 Zick M, Rabl R, Reichert AS (2009) Cristae formation-linking ultrastructure and  
620 function of mitochondria. Biochim Biophys Acta 1793: 5-19

## 621 **Figure legends**

### 622 **Fig 1. 3D visualization of mitochondrial development upon *Drosophila* eclosion.**

623 A thin-section TEM micrograph of *Drosophila* IFM at day 1 (a) and week 4 (b). A  
624 slice of a serial-section tomography reconstruction (c) and the segmentation (d) of  
625 *Drosophila* IFM at day 1. (a) red arrows: cytoplasmic ribosomal-like densities; yellow  
626 arrows: close inter-mitochondrial contacts. (d) blue: cristae; red: mitochondrial  
627 ribosomal-like densities; green: cytoplasmic ribosomal-like densities.

628

### 629 **Fig 2. Analysis of protein contents during mitochondrial development.**

630 Immuno-EM labeling of ATP5A of *Drosophila* IFM at day 1 (a) and week 4 (b).  
631 Western-blot analysis of mitochondrial proteins ATP5A, PDHA1, SOD2, CytC and  
632 ribosomal protein RPS6 of *Drosophila* at day 1, week 1, and week 4 (c). The relative  
633 protein abundance was quantified by the densitometry and normalized to the signal of  
634  $\alpha$ -tubulin. The ratios were subsequently normalized to those of week 4.

635

### 636 **Fig 3. Cristae morphogenesis coordinates with COX assembly**

637 A thin-section TEM micrograph of *Drosophila* IFM at day 1 (a) and week 4 (b)  
638 stained for COX activity. Tomographic slices across the z-axis and the corresponding  
639 segmentation of *Drosophila* IFM at day 1 stained for COX activity were shown (c).  
640 3D representations of the tomographic segmentation were shown in (d) and (e). (c-e),  
641 red: COX-positive cristae; yellow: COX-negative reticular membranes. Positive COX  
642 activity appeared darkly stained in the micrographs. (a) red arrows: COX-positive  
643 cristae; yellow arrows: COX-negative membranes.

644

### 645 **Fig 4. Ultrastructural tracking of COX4 and OXA1 during cristae biogenesis**

646 Apex2 staining of the IFM of COX4-Apex2 knock-in flies (a) and OXA1-Apex2  
647 knock-in flies (c) at day 1 were shown. Apex2 staining of the wild type at day 1 as  
648 negative controls were shown in (b) and (d), respectively. Apex2 staining of S2 cells  
649 transfected with and without plasmids expressing *D. melanogaster* OXA1-Apex2 was  
650 shown in (e) and (f), respectively. Positive Apex2 signals appeared darkly stained in  
651 the micrographs.

652



653 **Fig 5. Marf-knockdown flies formed lamellar cristae containing COX and ATP**  
654 **synthase**

655 Thin-section TEM micrograph (a), the tomographic segmentation (b-d), COX activity  
656 staining (e), immuno-EM against ATP5A (f), and ATP synthase OSCP-Apex2  
657 staining (g) of Marf-knockdown flies at week 4 were shown. Positive Apex2 signal or  
658 COX activity appeared darkly stained in the micrographs.

659

660 **Fig 6. OPA1-knockdown flies showed impaired cristae biogenesis and function**

661 OPA1-knockdown flies at day 1 were analyzed by thin-section TEM (a), COX  
662 activity staining (b), immuno-EM against ATP5A (c), ATP synthase OSCP-Apex2  
663 staining (d), and the tomographic segmentation (f). Sub-mitochondrial localization of  
664 OPA1 was tracked in 293T cells overexpressing human OPA1-Apex2 (e).

Fig 1

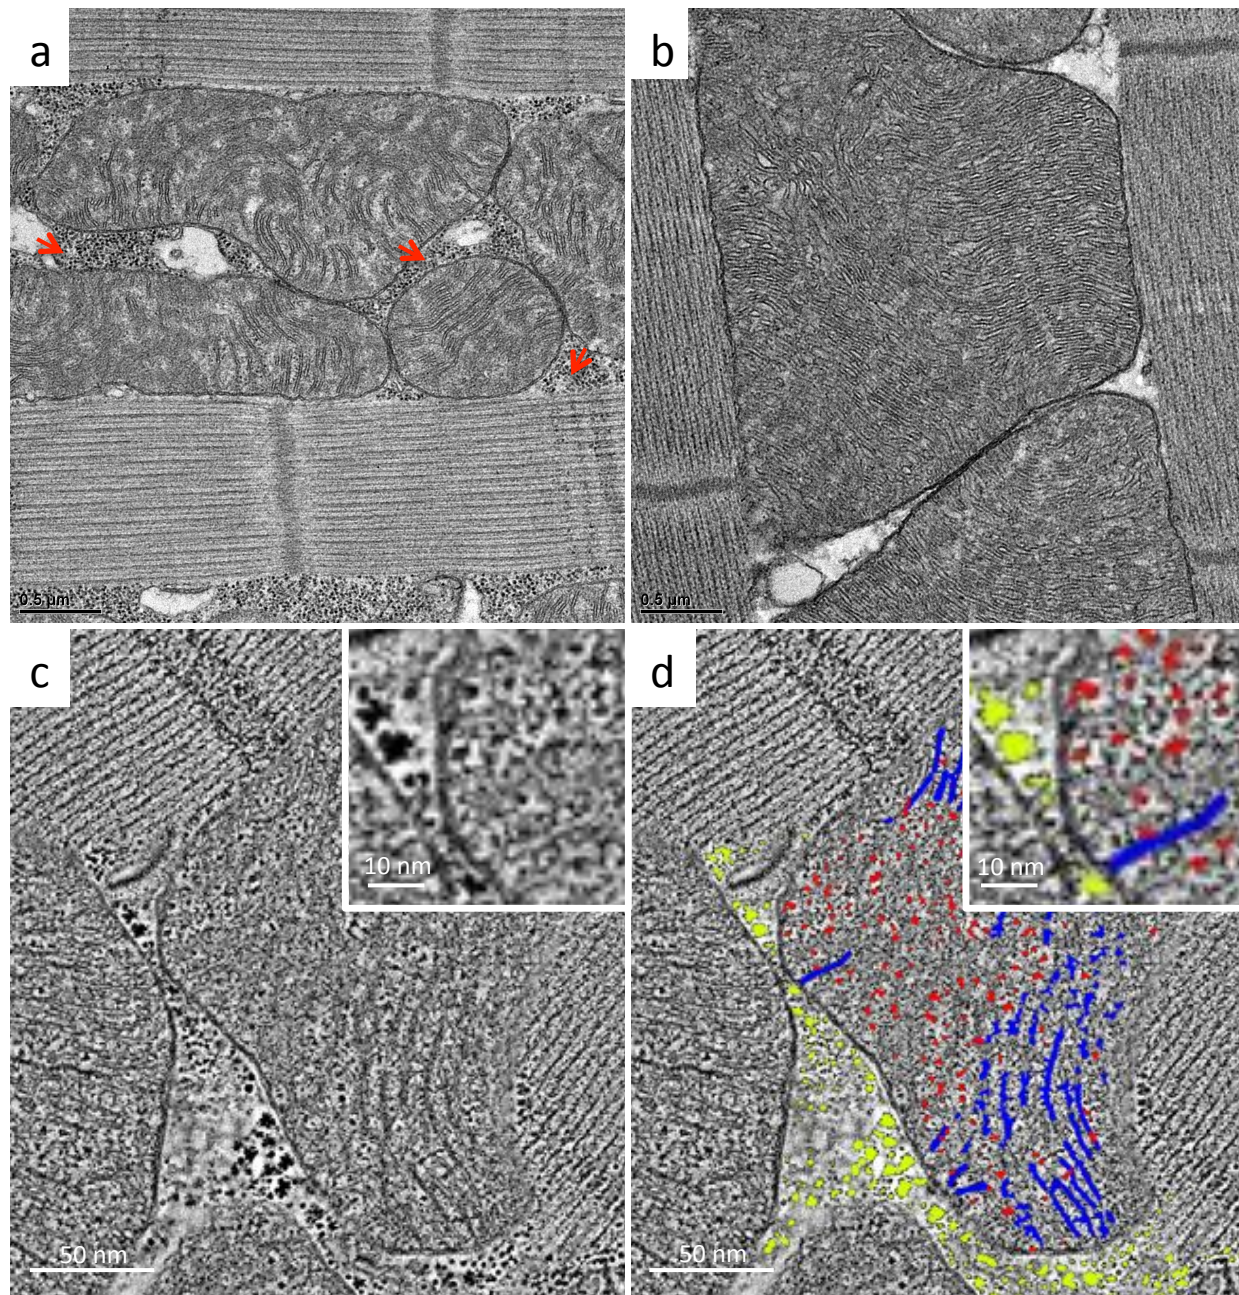

Fig 2

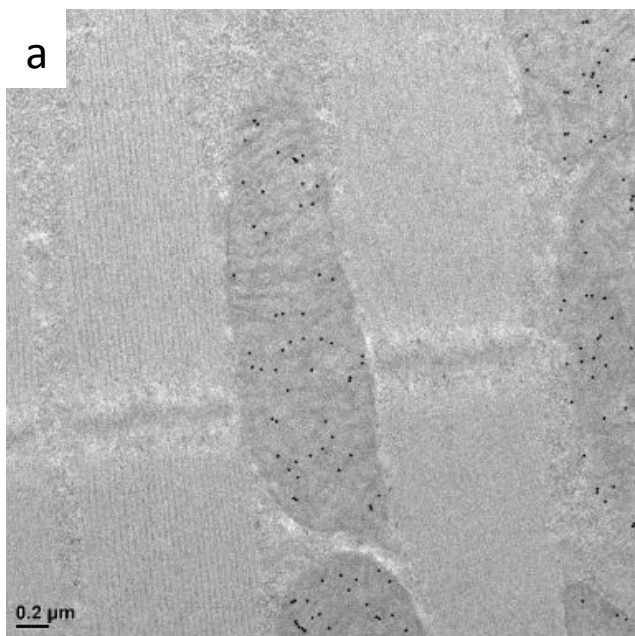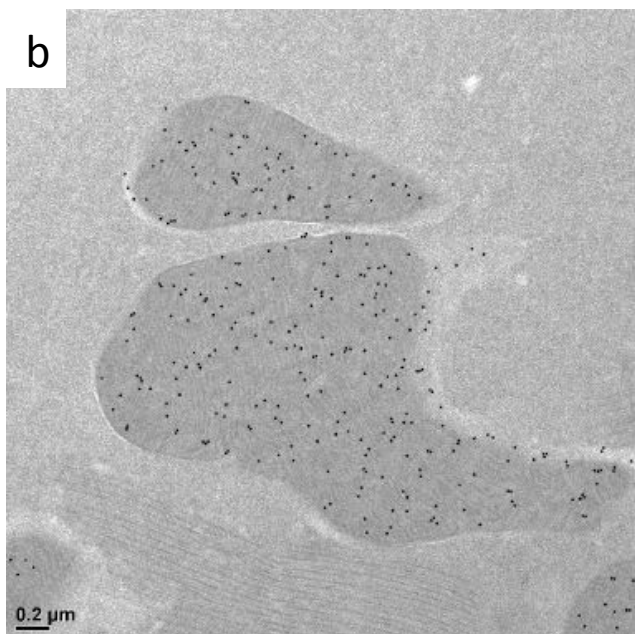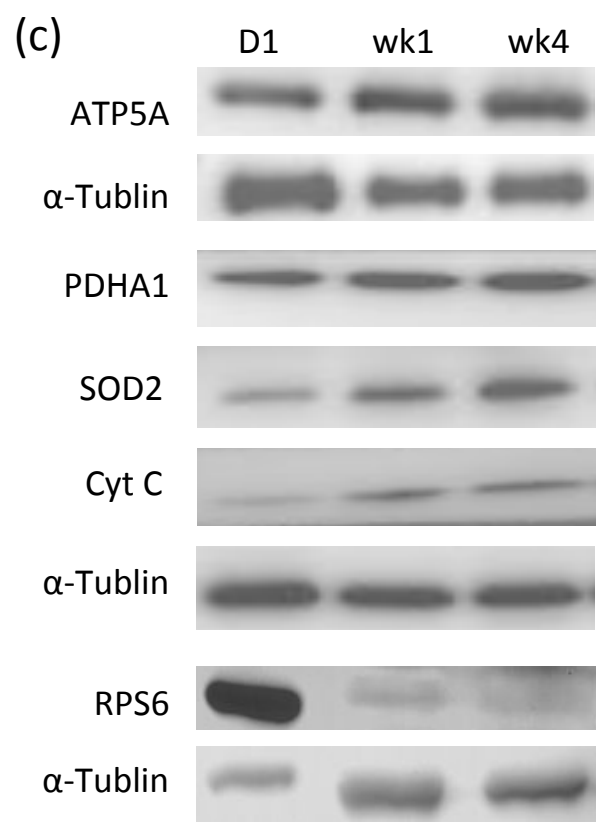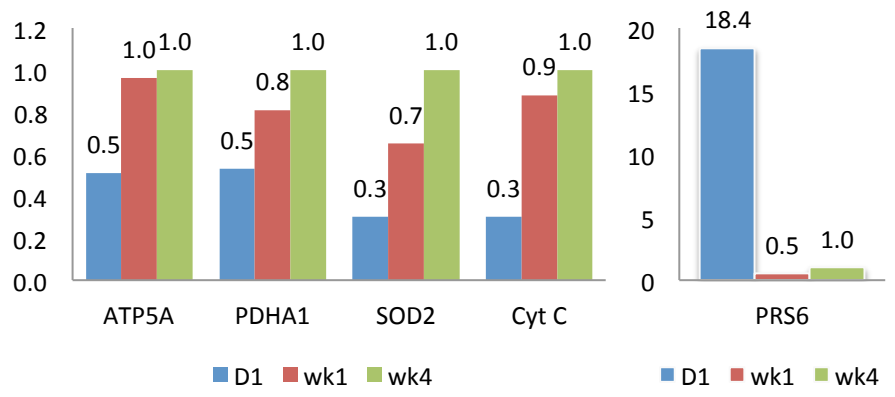

Fig 3

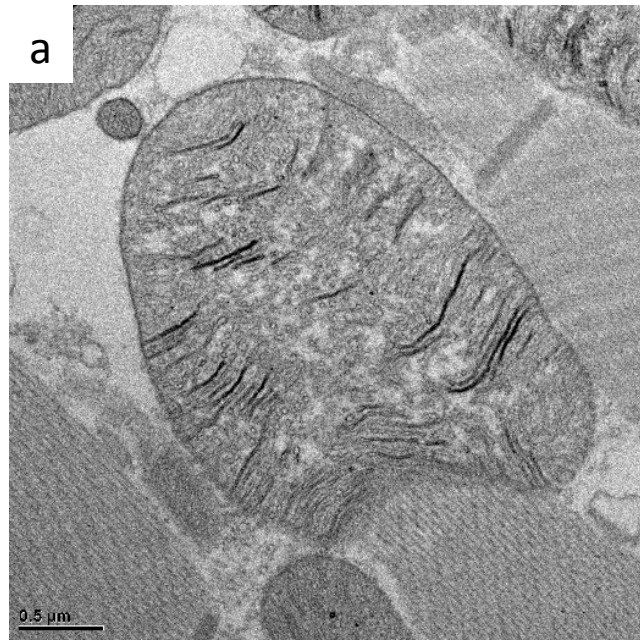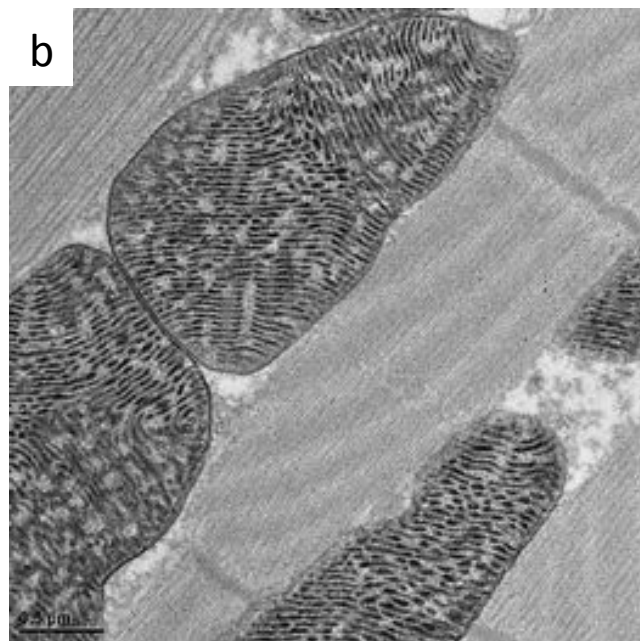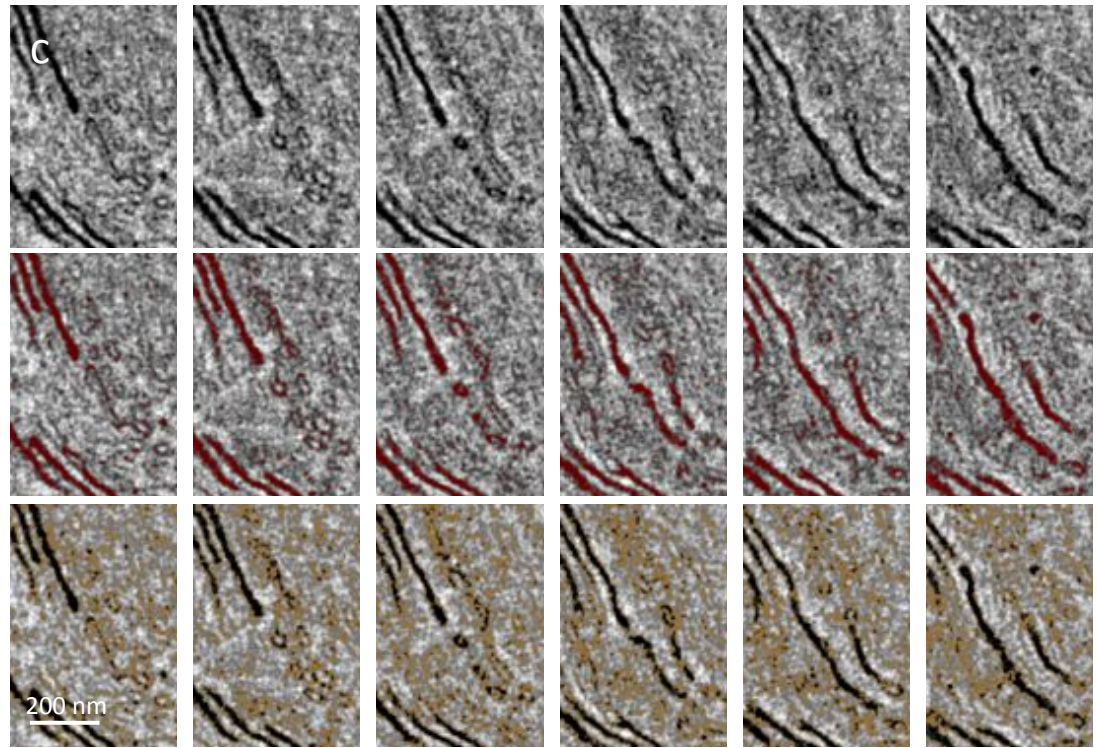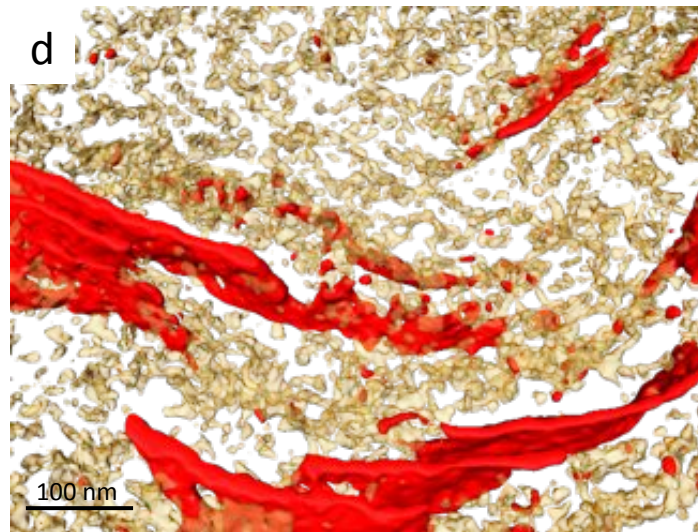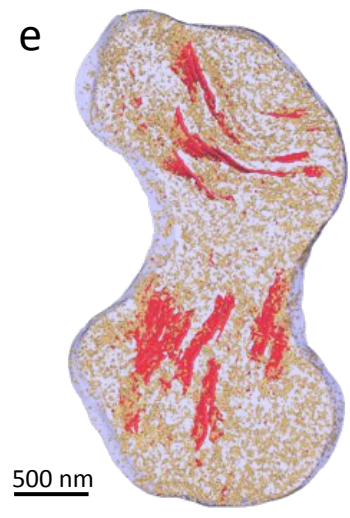

Fig 4

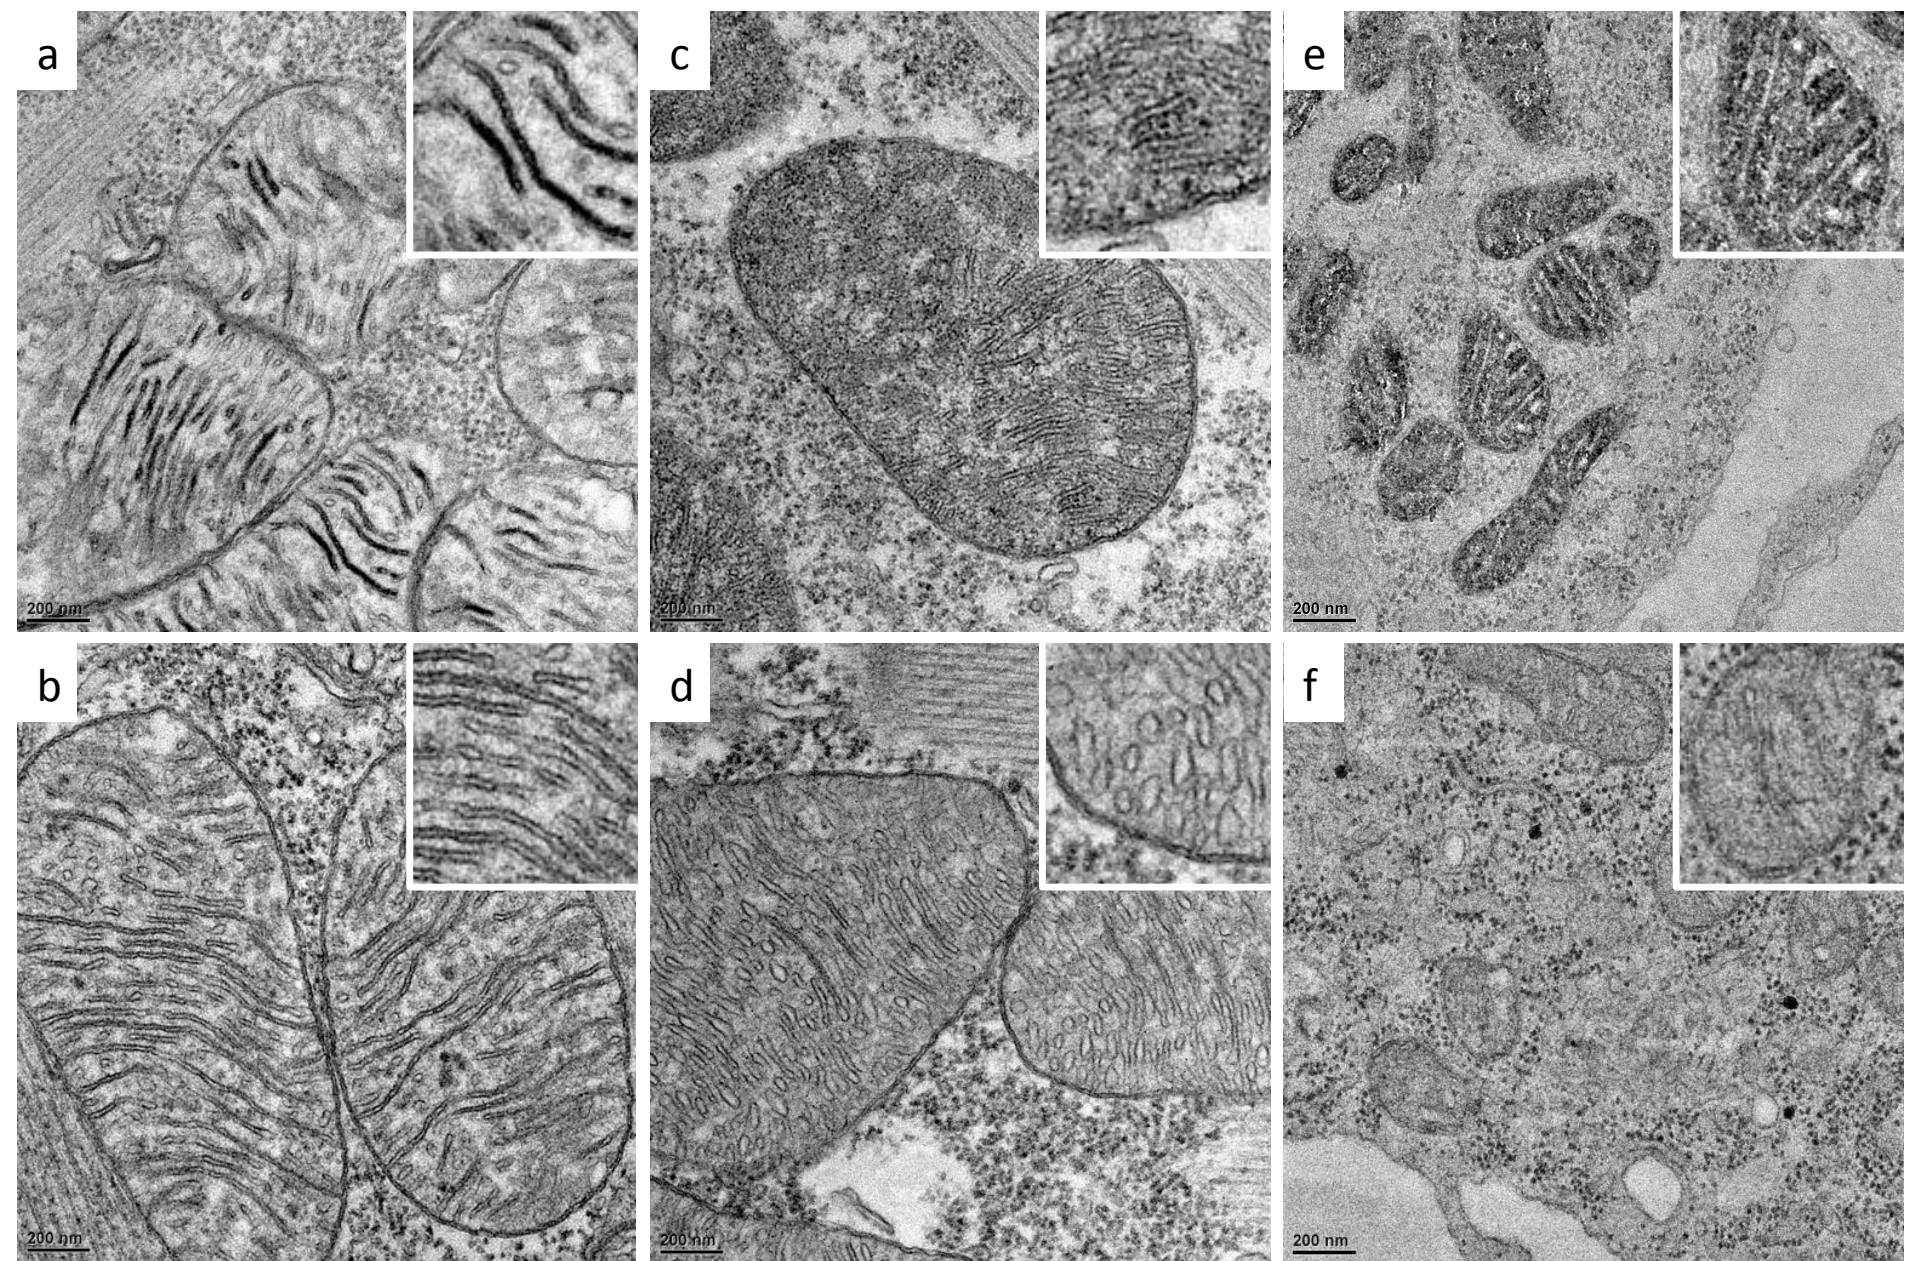

Fig 5

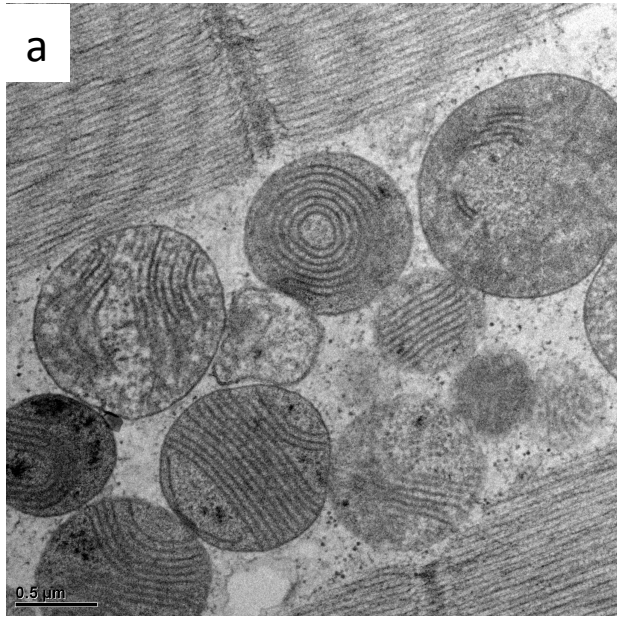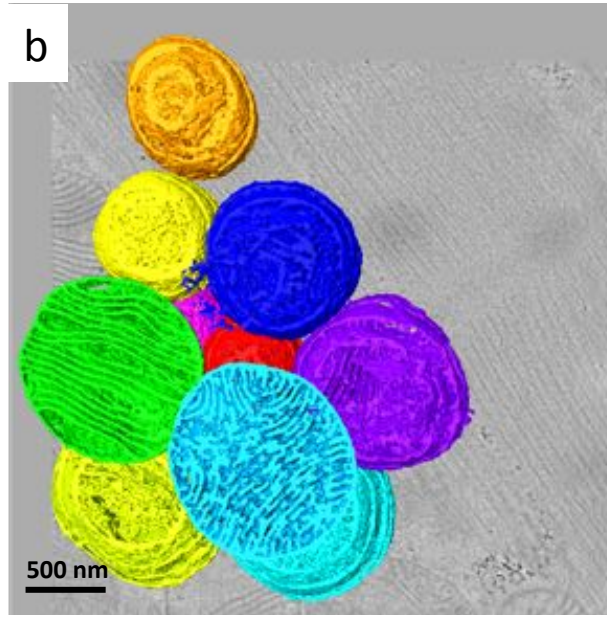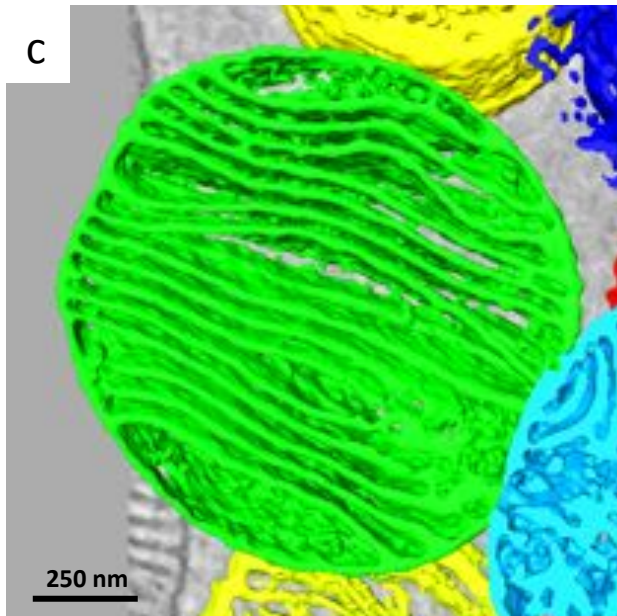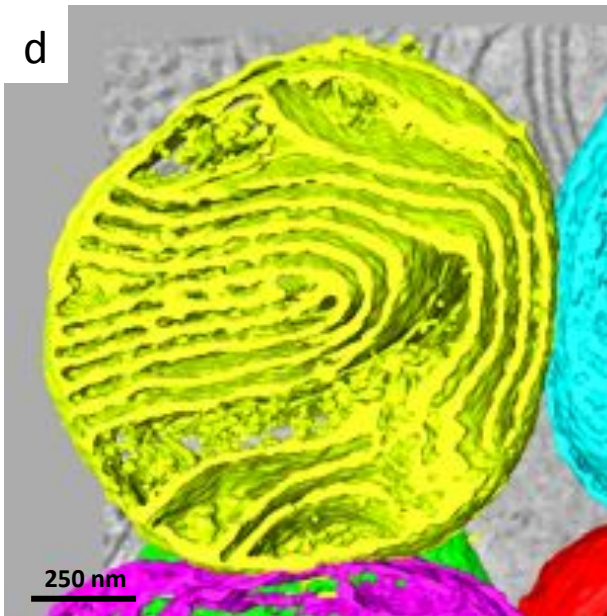

Fig 5

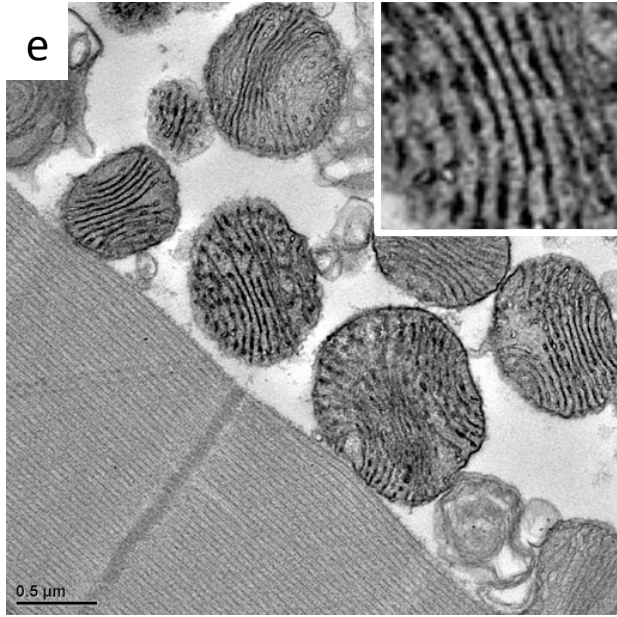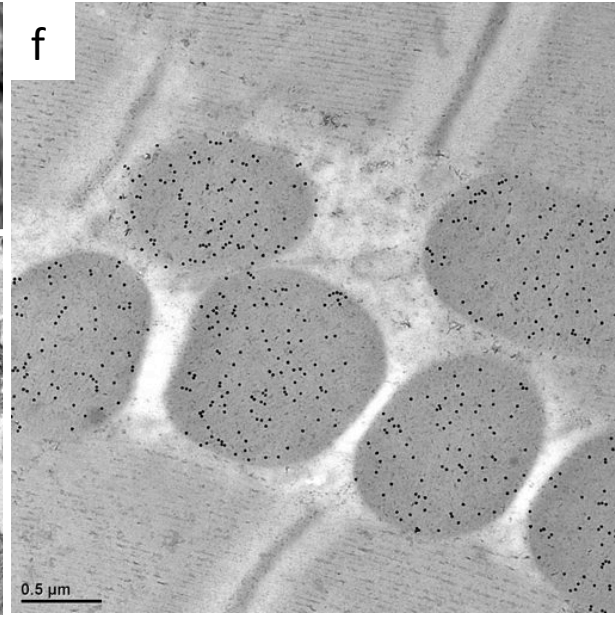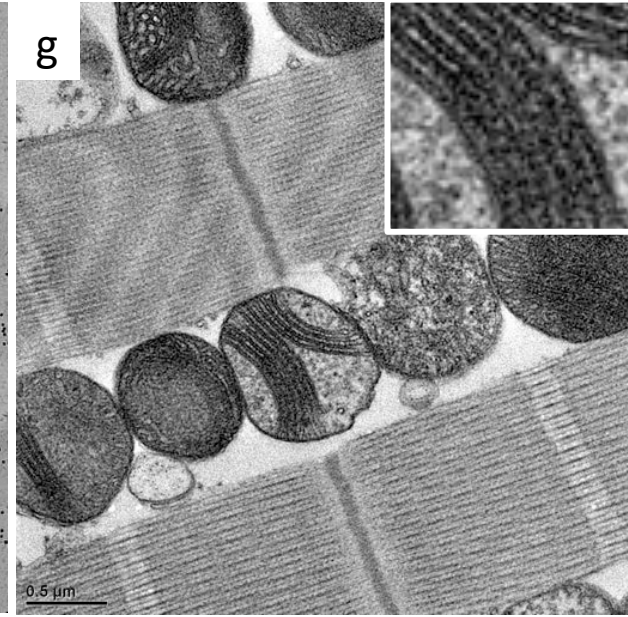

Fig 6

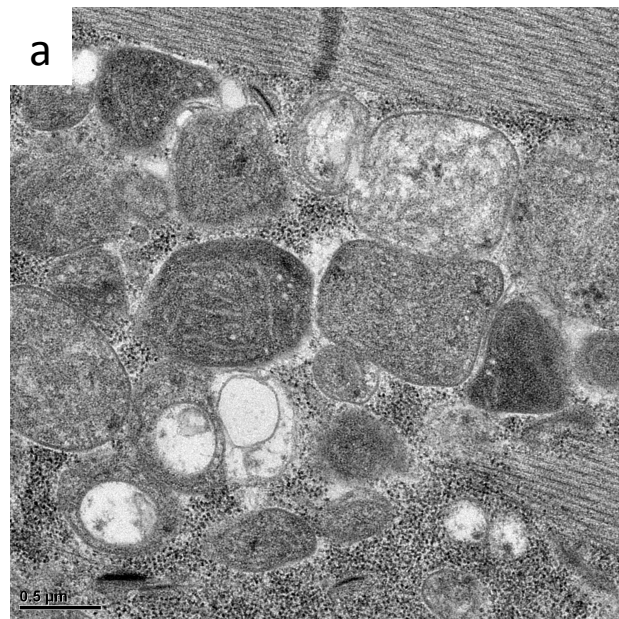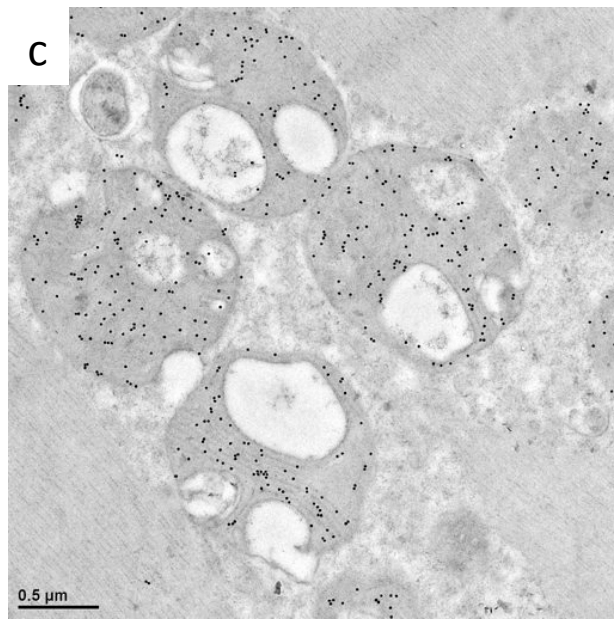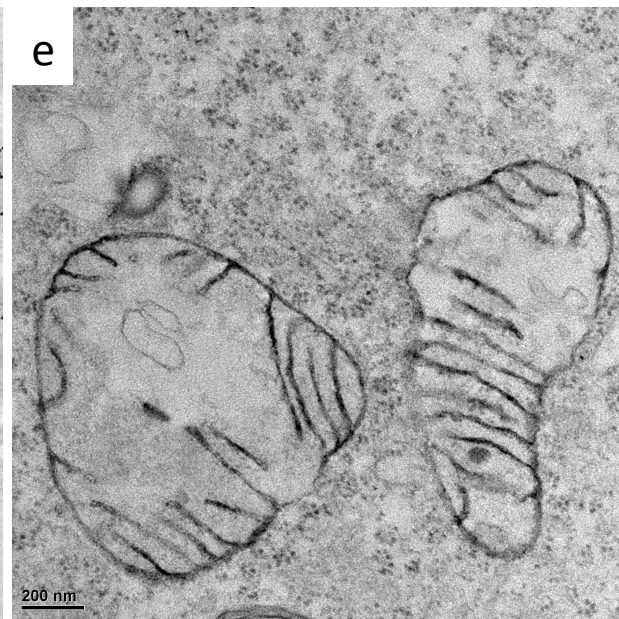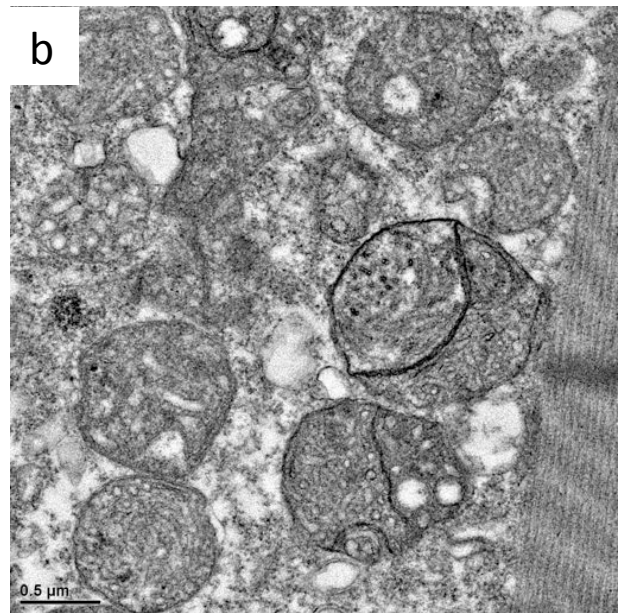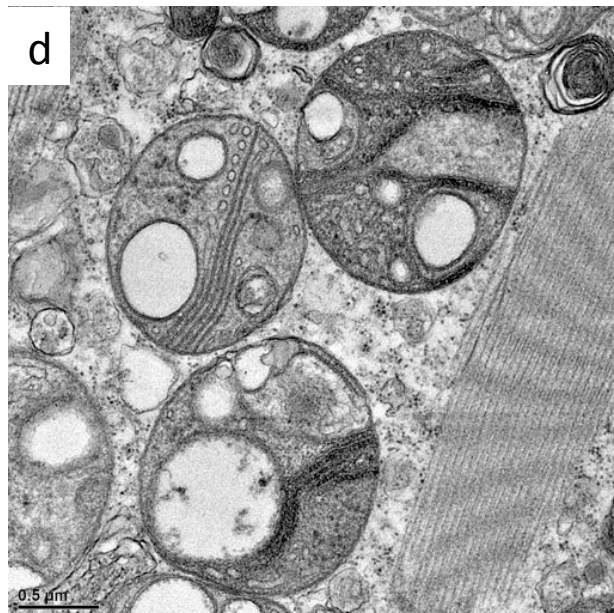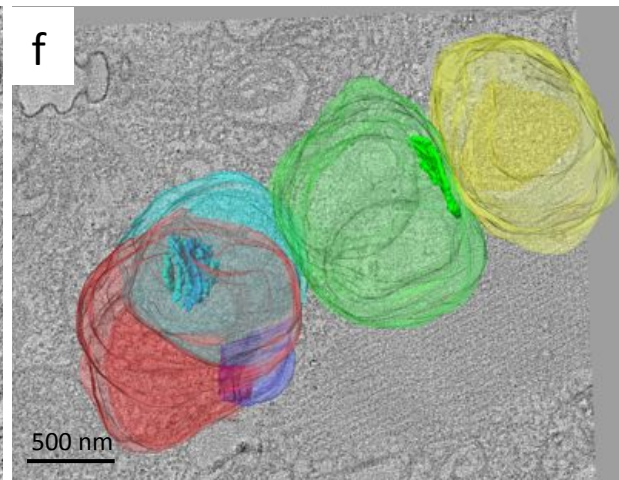



Fig S1

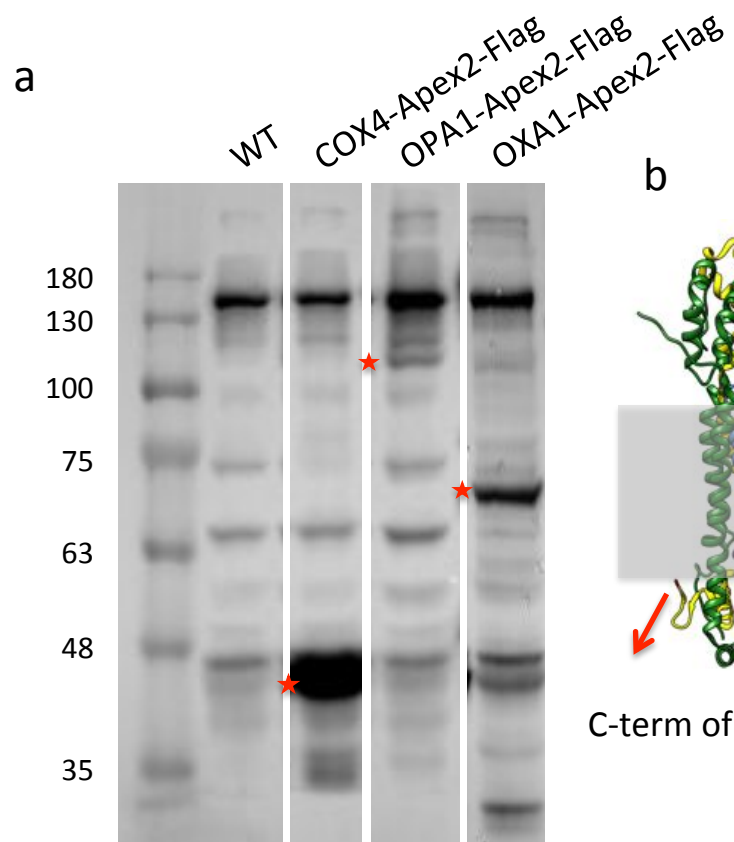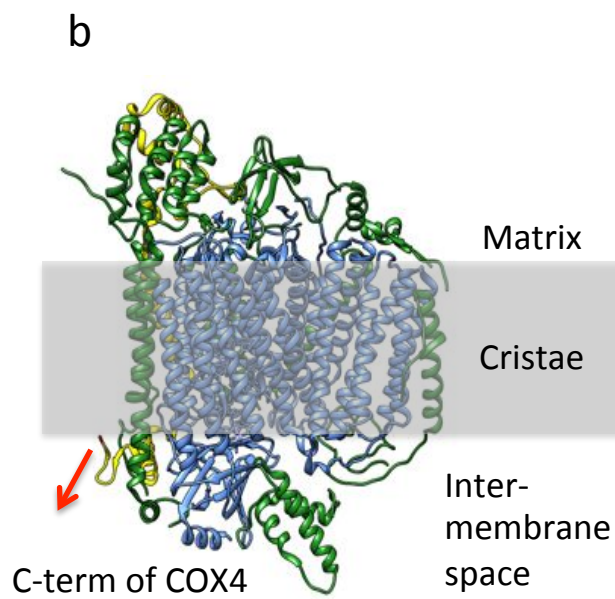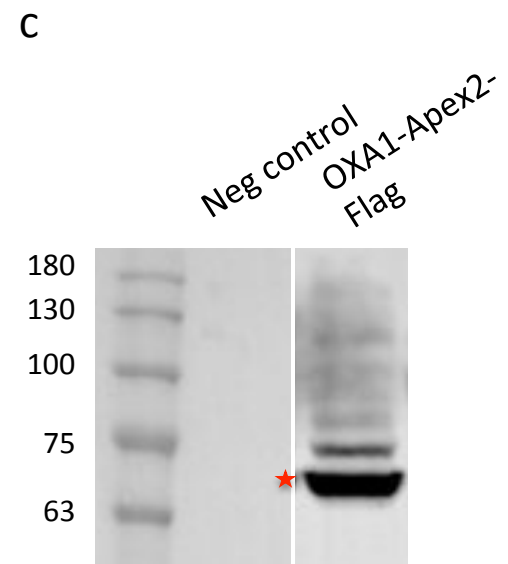

Fig S2

(a)

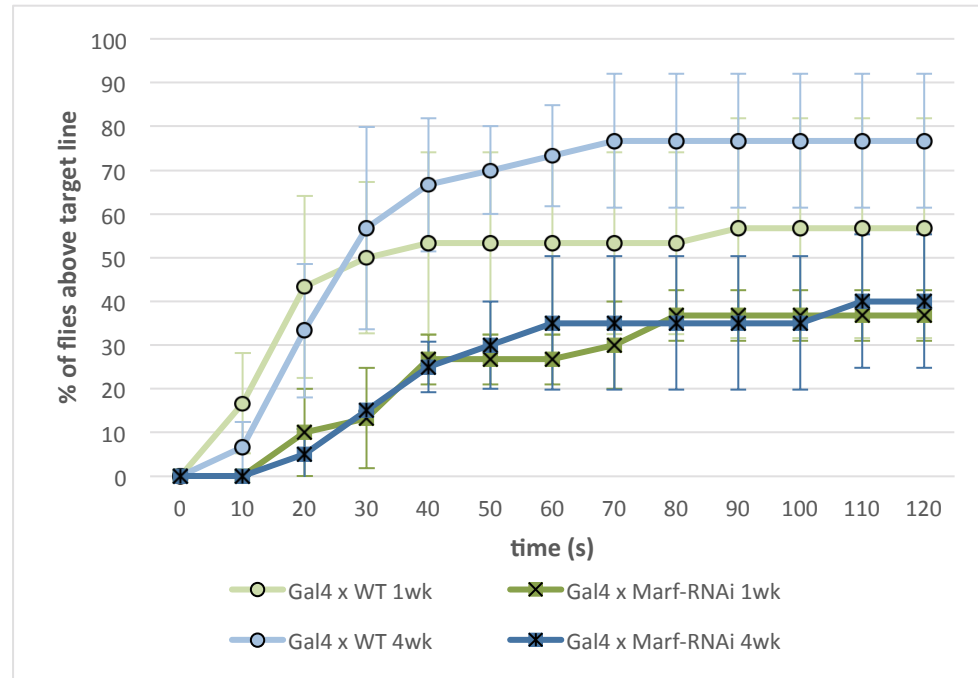

(b)

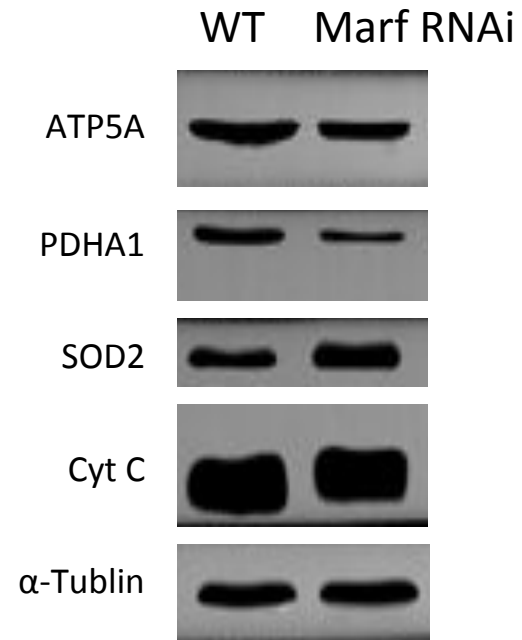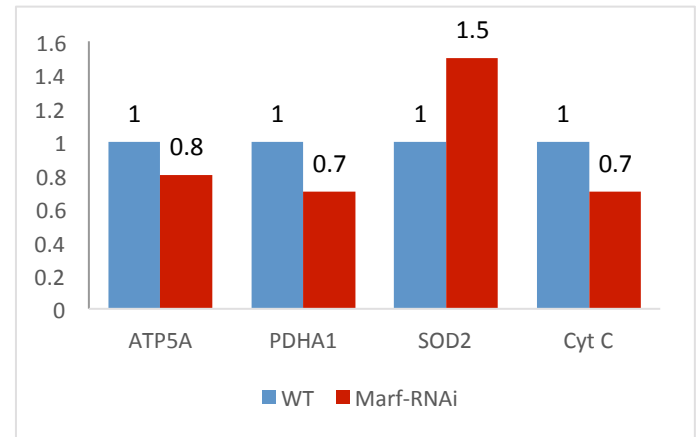

Fig S2

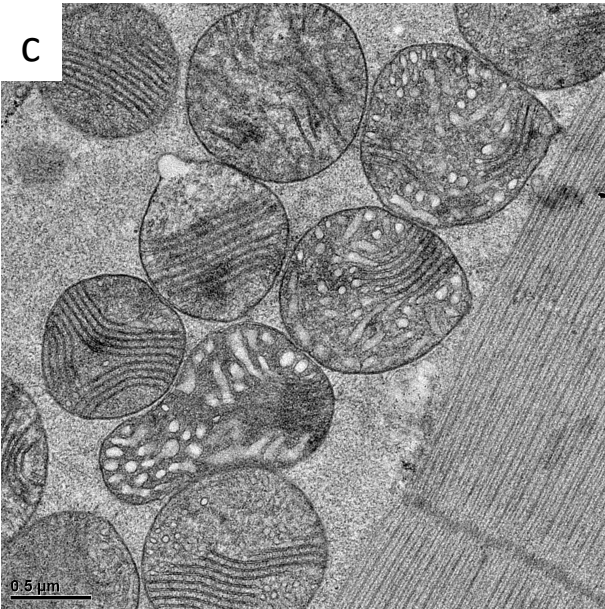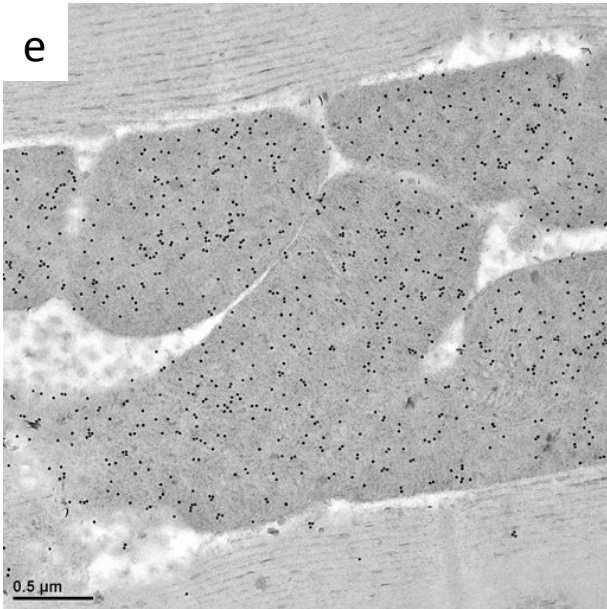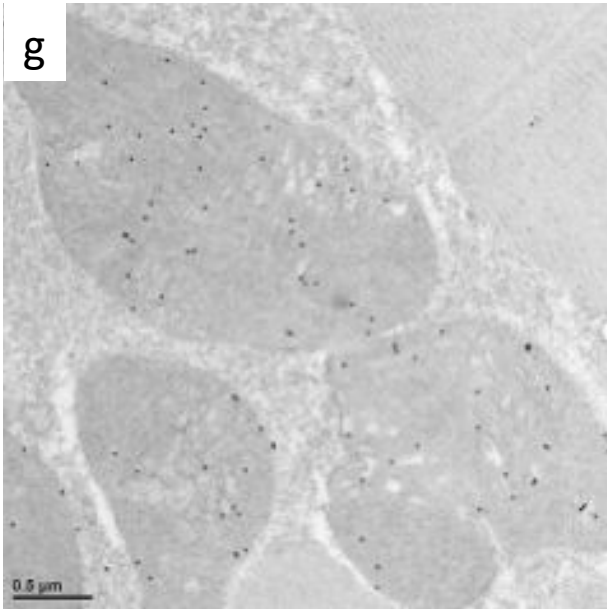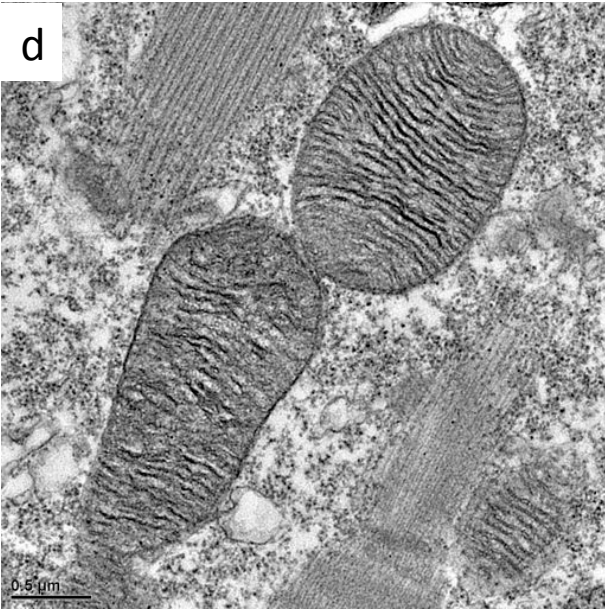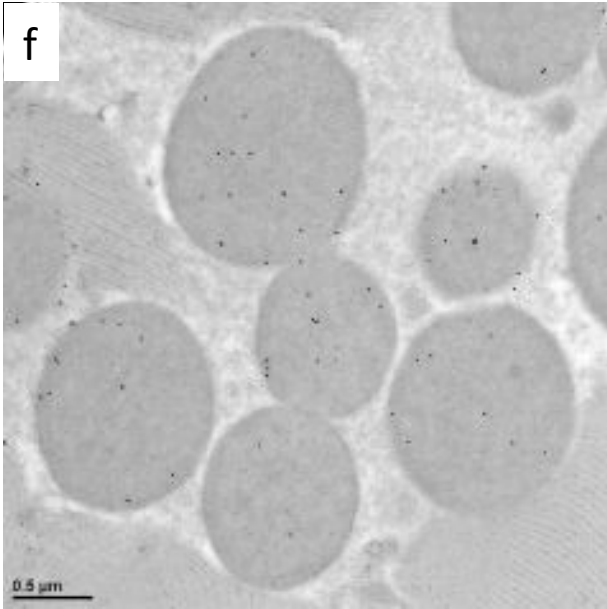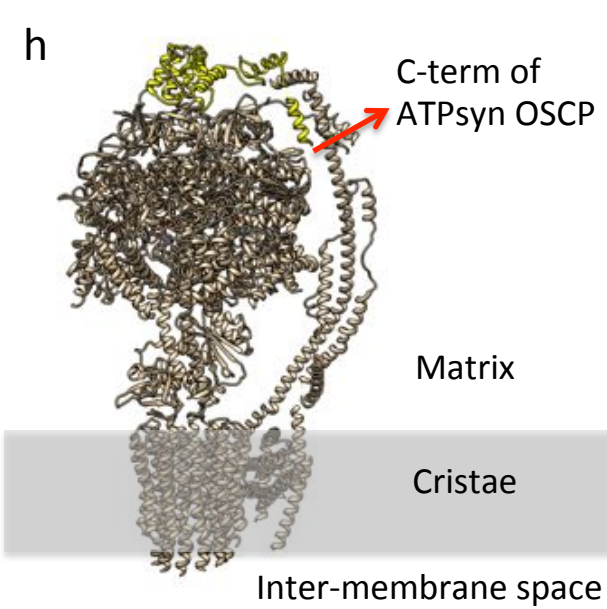

Fig S3

(a)

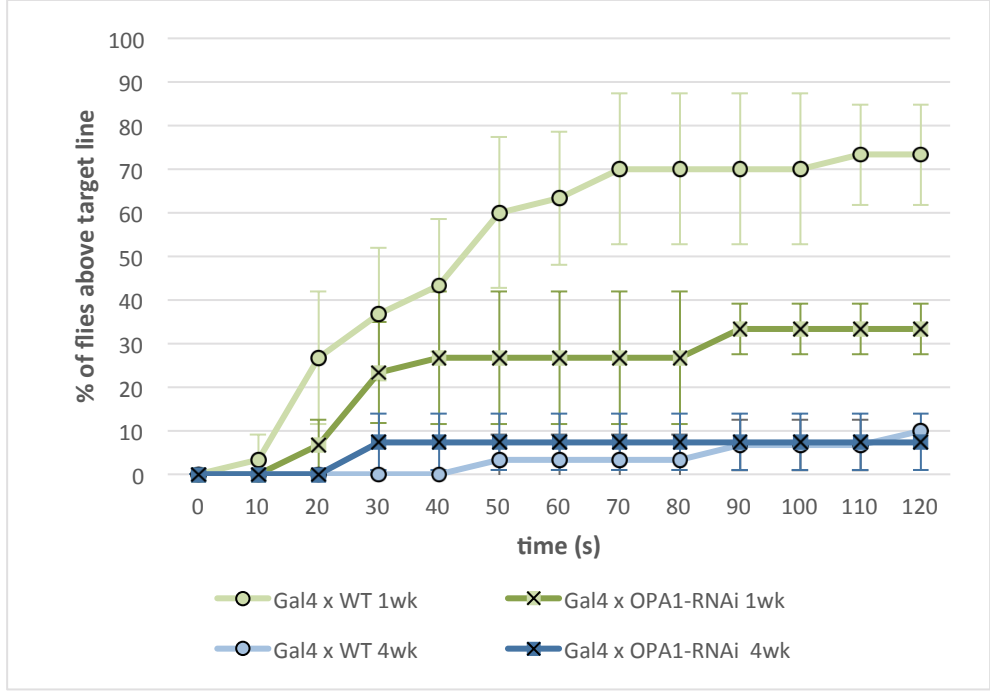

(b)

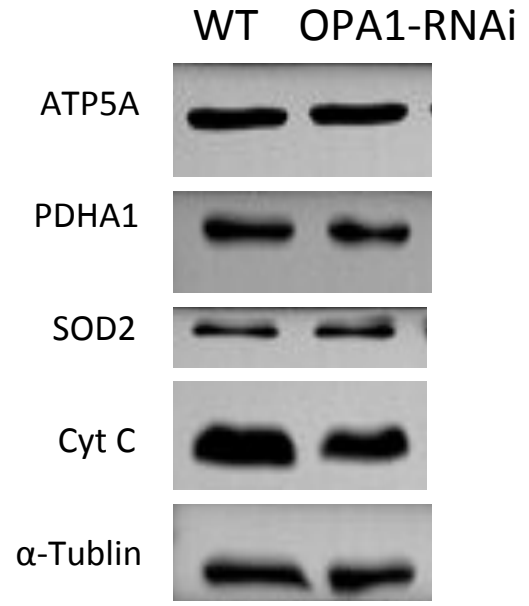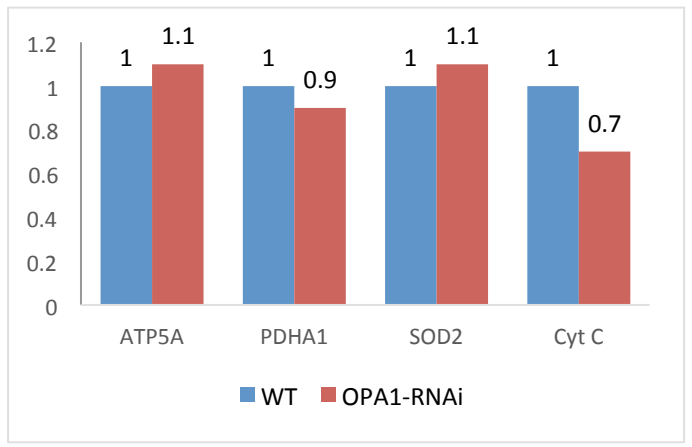

Fig S3

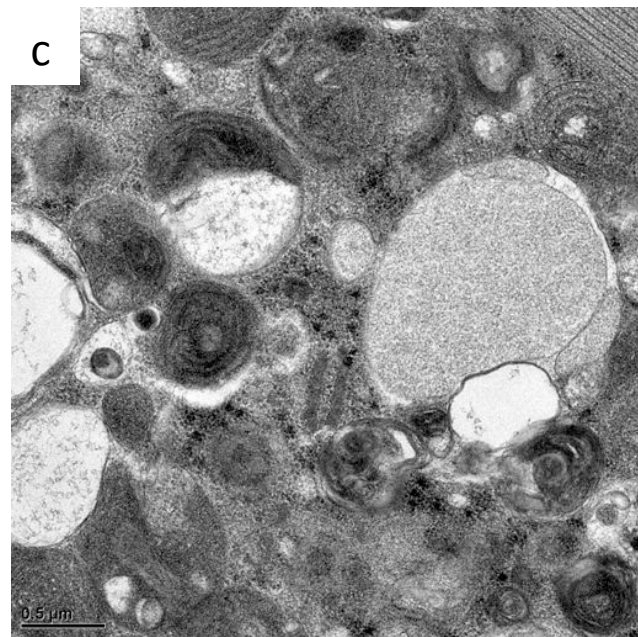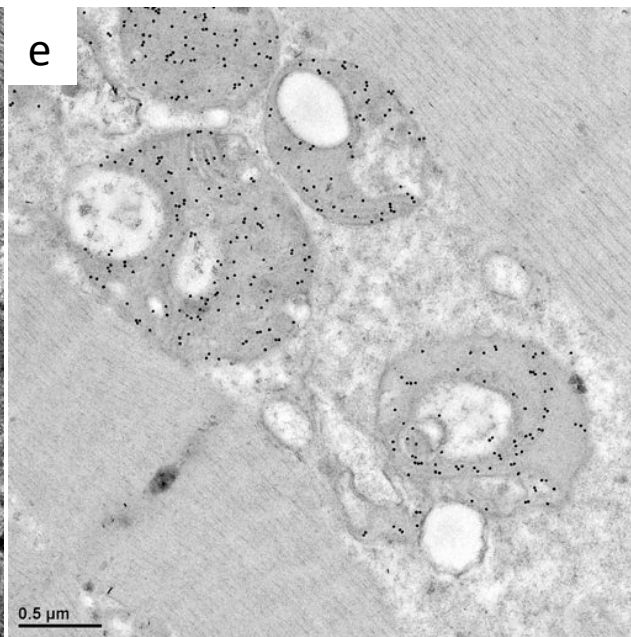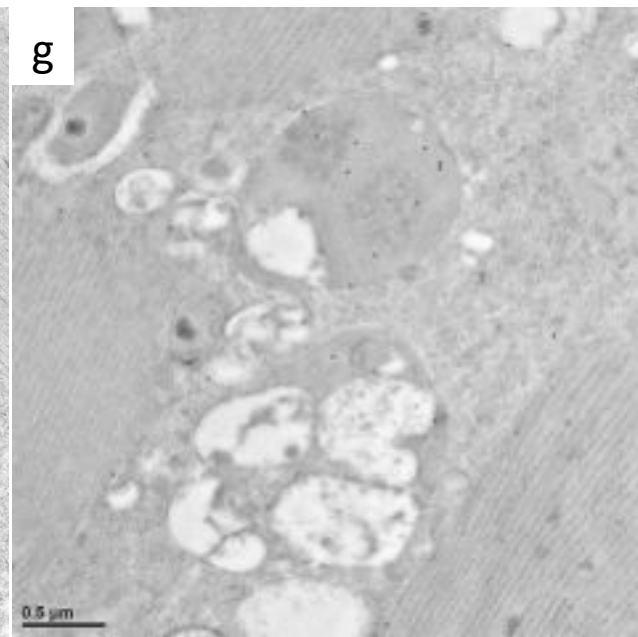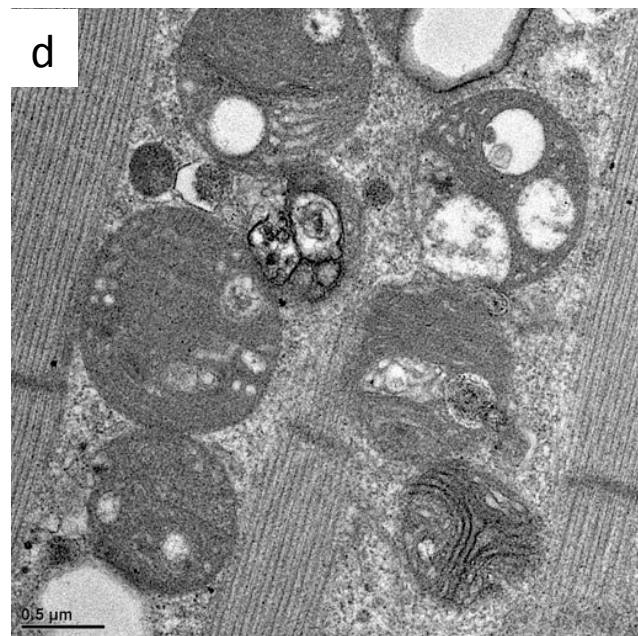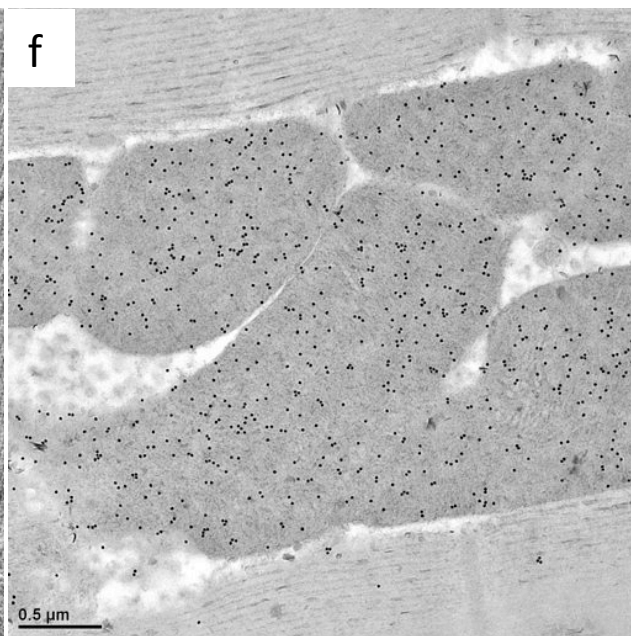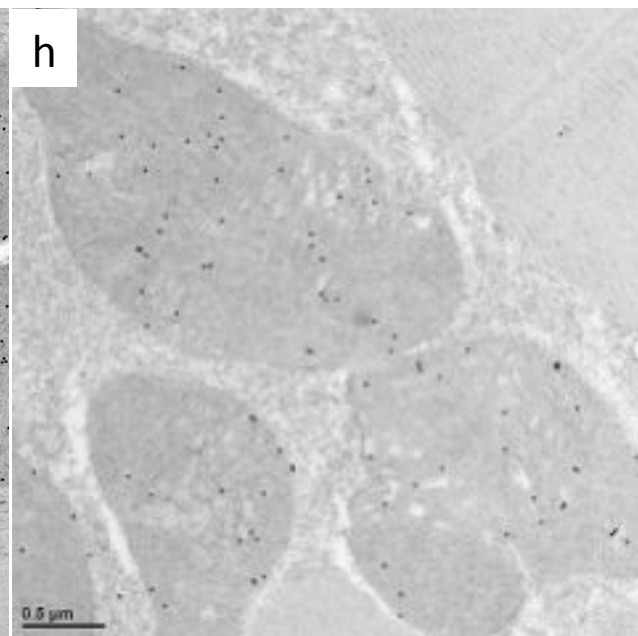

Fig S4

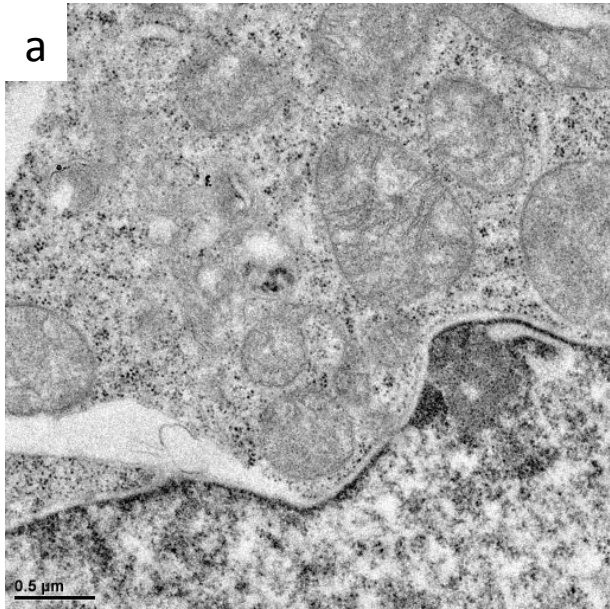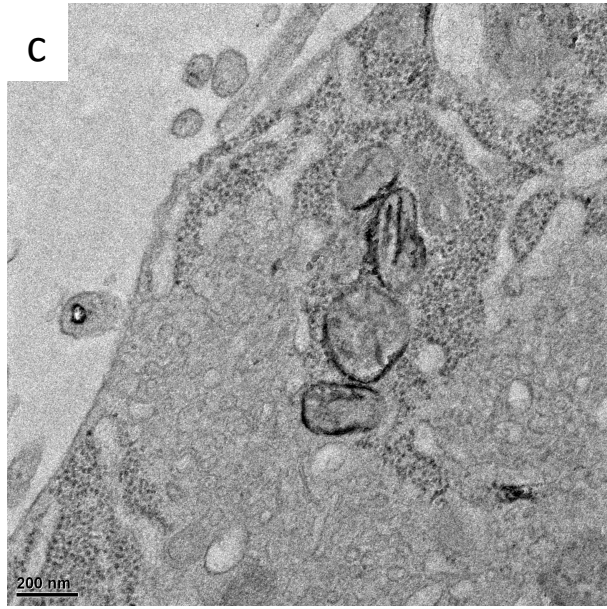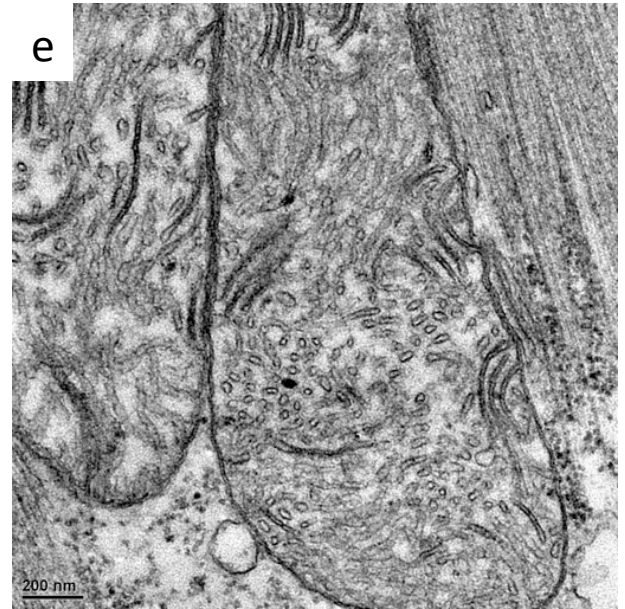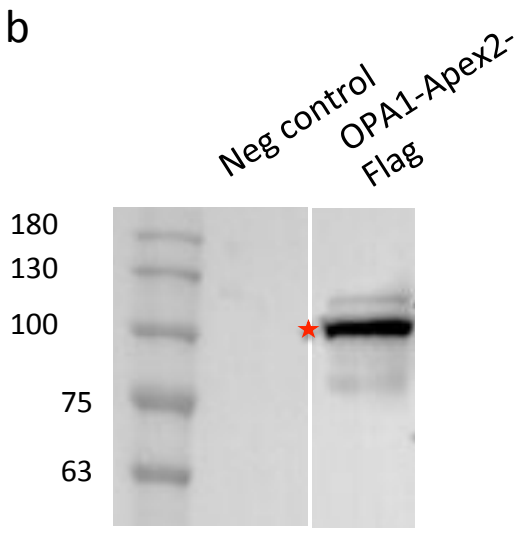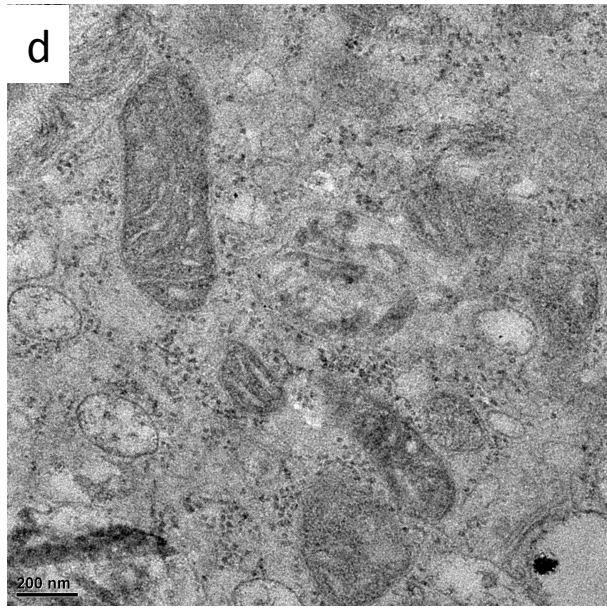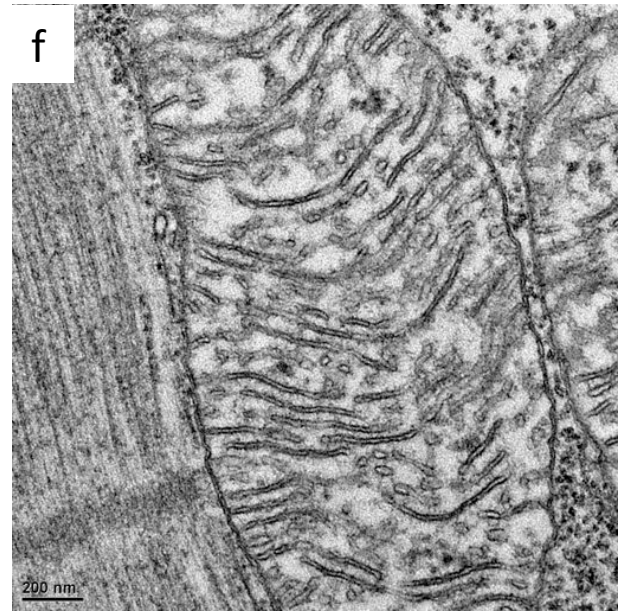

Source: https://www.biorxiv.org/content/10.1101/503474v2.full.pdf
